17 **Abstract**

18

19 The innate immune system detects pathogens and initiates adaptive immune responses.

20 Inflammasomes are central components of the innate immune system, but whether

21 inflammasomes provide sufficient signals to activate adaptive immunity is unclear. In intestinal  
22 epithelial cells (IECs), inflammasomes activate a lytic form of cell death called pyroptosis,

23 leading to epithelial cell expulsion and the release of cytokines. Here we employed a genetic

24 system to show that simultaneous antigen expression and inflammasome activation specifically

25 in IECs is sufficient to activate CD8<sup>+</sup> T cells. By genetic elimination of direct T cell priming by

26 IECs, we found that IEC-derived antigens are cross-presented to CD8<sup>+</sup> T cells. However,

27 activation of CD8<sup>+</sup> T cells by IEC-derived antigen only partially depended on IEC pyroptosis. In

28 the absence of inflammasome activation, cross-priming of CD8<sup>+</sup> T cells required *Batf3*<sup>+</sup> dendritic

29 cells (cDC1), whereas cross-priming in the presence of pyroptosis did not. These data suggest the

30 existence of parallel pyroptosis-dependent and pyroptosis-independent but cDC1-dependent

31 pathways for cross-presentation of IEC-derived antigens.

## 32 **Introduction**

33

34 The innate immune system provides a crucial first line of defense against invading pathogens,  
35 and in addition, activates and guides subsequent adaptive immune responses. Although the role  
36 of innate immunity in promoting adaptive immunity has long been appreciated (Janeway, 1989),  
37 most studies have focused on the contributions of Toll-like receptors (TLRs), and significantly  
38 less is known about how other innate immune pathways influence adaptive immunity (Iwasaki &  
39 Medzhitov, 2015).

40 Inflammasomes are a heterogeneous group of cytosolic innate immune sensors, each of  
41 which oligomerizes in response to specific stimuli, including pathogen-associated molecules and  
42 activities or cellular damage (Broz & Dixit, 2016; Rathinam & Fitzgerald, 2016). Regardless of  
43 the input signal, a common output of inflammasome activation is the recruitment and activation  
44 of caspase proteases (e.g., Caspase-1), which cleave and activate the inflammatory cytokines  
45 pro-interleukin (IL)-1 $\beta$  and pro-IL-18 and/or the pore-forming protein gasdermin D. Active  
46 gasdermin D oligomerizes in the plasma membrane to form pores that serve as a conduit for the  
47 release of active IL-1 $\beta$  and IL-18 and can also initiate pyroptotic cell death and/or lysis (de  
48 Vasconcelos, Van Opdenbosch, Van Gorp, Parthoens, & Lamkanfi, 2019; DiPeso, Ji, Vance, &  
49 Price, 2017; Evavold et al., 2018; He et al., 2015; Heilig et al., 2018; Kayagaki et al., 2015; Shi  
50 et al., 2015). In intestinal epithelial cells (IECs), inflammasome activation also results in the  
51 expulsion of cells from the epithelial monolayer into the intestinal lumen. Pyroptosis and cell  
52 expulsion provide host defense against intracellular pathogens by eliminating their replicative  
53 niche (Fattinger et al., 2021; Hausmann et al., 2020; Mitchell et al., 2020; Rauch et al., 2017;  
54 Sellin et al., 2014).

55 The role of inflammasomes during adaptive immunity remains incompletely understood  
56 and inflammasomes appear to have both beneficial and detrimental effects on the adaptive  
57 response, depending on the context (Deets & Vance, 2021; Evavold & Kagan, 2018). While  
58 there remains limited evidence on how inflammasome activation and pyroptosis impacts  
59 presentation of cell-derived antigens, IL-1 $\beta$  and IL-18 have been implicated in driving type 1  
60 helper T cell (Th1), Th17, and CD8<sup>+</sup> T cell immunity following bacterial infections (Kupz et al.,  
61 2012; O'Donnell et al., 2014; Pham et al., 2017; Tourlomousis et al., 2020; Trunk & Oxenius,  
62 2012). Likewise, CD4<sup>+</sup> and CD8<sup>+</sup> T cell responses to influenza have been shown to require  
63 inflammasome signaling components (Ichinohe, Lee, Ogura, Flavell, & Iwasaki, 2009).  
64 However, inflammasome activation has also been found to inhibit T cell-mediated immunity  
65 (Sauer et al., 2011; Theisen & Sauer, 2017), including through the pyroptotic destruction of key  
66 antigen presenting cells (APCs) (McDaniel, Kottyan, Singh, & Pasare, 2020; Tourlomousis et al.,

67 2020). Inflammasomes have also been suggested to influence adaptive responses to tumors  
68 (reviewed in (Deets & Vance, 2021; Evavold & Kagan, 2018)).

69 To date, most studies have evaluated the effect of inflammasome activation on adaptive  
70 immunity in the context of infections. Though they are physiologically relevant, microbial  
71 infections are also complex to analyze since they engage multiple innate receptors, including  
72 TLRs. It thus remains unknown whether inflammasome activation alone provides sufficient co-  
73 stimulatory signals to initiate an adaptive response. In addition, the fate of antigens after  
74 inflammasome activation remains poorly understood. Conceivably, expulsion of pyroptotic  
75 epithelial cells may result in the loss of antigen, thereby hindering adaptive immunity, or  
76 alternatively, pyroptosis may promote the release of antigens to APCs to activate adaptive  
77 immunity.

78 To investigate how inflammasome activation might influence adaptive immunity, we  
79 focused on the NAIP–NLRC4 inflammasomes, which specifically respond to flagellin (via  
80 NAIP5/6) or bacterial type III secretion system proteins (via NAIP1/2) (Kofoed & Vance, 2011;  
81 Rauch et al., 2016; Zhao et al., 2016; Zhao et al., 2011). Although most inflammasomes require  
82 the adaptor protein Apoptosis-associated Speck-like protein containing a Caspase-activation and  
83 recruitment domain (ASC) to recruit and activate pro-Caspase-1, NLRC4 is able to bind and  
84 activate pro-Caspase-1 directly—though ASC has been found to enhance the production of IL-1 $\beta$   
85 and IL-18 (Broz, Newton, et al., 2010; Broz, von Moltke, Jones, Vance, & Monack, 2010;  
86 Mariathasan et al., 2004). Cleavage of gasdermin D does not require ASC following NAIP–  
87 NLRC4 activation (He et al., 2015; Kayagaki et al., 2015; Shi et al., 2015). NAIPs and NLRC4  
88 are highly expressed in intestinal epithelial cells (IECs), where they provide defense against  
89 enteric bacterial pathogens including *Citrobacter* (Nordlander, Pott, & Maloy, 2014), *Salmonella*  
90 (Fattinger et al., 2021; Hausmann et al., 2020; Rauch et al., 2017; Sellin et al., 2014) and  
91 *Shigella* (Mitchell et al., 2020). Inflammasome-driven IEC expulsion appears to be a major  
92 mechanism by which NAIP–NLRC4 provides innate defense against enteric pathogens.  
93 However, it is not currently known how pyroptosis and IEC expulsion influence the availability  
94 of IEC-derived antigens and what impact this has on the adaptive immune response.

95 Indeed, even at steady state in the absence of inflammasome activation and pyroptosis, it  
96 remains unclear how antigens present in IECs are delivered to APCs to stimulate adaptive  
97 immune responses, or whether perhaps IECs can directly activate T cells (Christ & Blumberg,  
98 1997; Nakazawa et al., 2004). Conventional type 1 dendritic cells (cDC1s) are thought to acquire  
99 apoptotic bodies from IECs and shuttle the cell-associated antigens through the MHC II pathway  
100 to drive a tolerogenic CD4<sup>+</sup> T cell response under homeostatic conditions (Cummings et al.,  
101 2016; Huang et al., 2000). Additionally, in the context of inflammation, a subset of migratory



102 cDC1s have been shown to also take up IEC-derived antigen to activate CD8<sup>+</sup> T cells; however,  
103 it remains unclear how these cDC1s acquire IEC-derived antigen.

104 Because NAIP–NLRC4 activation can result in IEC pyroptosis prior to the expulsion of  
105 IECs from the epithelium (Rauch et al., 2017), we hypothesized that cell lysis could release  
106 antigen basolaterally, which could then be taken up by cDC1s and cross-presented to CD8<sup>+</sup> T  
107 cells. To address the role of inflammasome-induced cell death in activation of CD8<sup>+</sup> T cells, we  
108 used a genetic mouse model in which an Ovalbumin (Ova)-Flagellin (Fla) fusion protein is  
109 inducibly expressed specifically in intestinal epithelial cells (Nichols, von Moltke, & Vance,  
110 2017). The OvaFla fusion protein provides a model antigenic epitope (SIINFEKL) to activate  
111 specific CD8<sup>+</sup> (OT-I) T cells (Hogquist et al., 1994), concomitant with the activation of the  
112 NAIP–NLRC4 inflammasome by a C-terminal fragment of flagellin that does not activate TLR5.  
113 This genetic system has the advantage of selectively activating inflammasome responses in the  
114 absence of exogenous or pathogen-derived TLR ligands, allowing us to address the sufficiency  
115 of inflammasome activation for adaptive responses. Our results suggest the existence of distinct  
116 pyroptosis-dependent and pyroptosis-independent pathways for cross-presentation of IEC-  
117 derived antigens *in vivo*.

118

119

## 120 **Results**

121

### 122 **Genetic system for NAIP–NLRC4 activation in IECs**

123 We took advantage of a previously established mouse model (Nichols et al., 2017) that allows  
124 for Cre-inducible and cell type-specific NAIP–NLRC4 activation (Figure 1A). These mice  
125 harbor an *OvaFla* gene fusion that encodes a non-secreted chicken ovalbumin protein—a model  
126 antigen—fused to the C-terminal 166 amino acids of flagellin—an agonist of NAIP–NLRC4 but  
127 not TLR5 (Nichols et al., 2017). The *OvaFla* gene is inserted within the constitutively expressed  
128 *Rosa26* locus, downstream of a floxed transcriptional stop cassette and upstream of an IRES-  
129 GFP cassette. To create a genetic system for inducible NAIP–NLRC4 activation in IECs, we  
130 crossed the *OvaFla* mice to Villin-Cre-ER<sup>T2</sup> mice (el Marjou et al., 2004), which harbor a  
131 tamoxifen-inducible Cre recombinase driven by the endogenous *Villin* promoter. The resulting  
132 *OvaFla* Villin-Cre-ER<sup>T2</sup> (hereafter shortened to “OvaFla”) mice respond to tamoxifen  
133 administration by expressing Cre, and subsequently the OvaFla protein, specifically in IECs. To  
134 study the influence of NAIP–NLRC4 activation, pyroptosis, and cytokine production on CD8<sup>+</sup> T  
135 cell activation, we generated *Nlrc4*<sup>-/-</sup>, *Gsdmd*<sup>-/-</sup>, and *Asc*<sup>-/-</sup> OvaFla lines.

136 Tamoxifen is typically administered in a corn oil emulsion through oral gavage or  
137 intraperitoneal injection. In preliminary experiments, we found corn oil contains trace bacterial

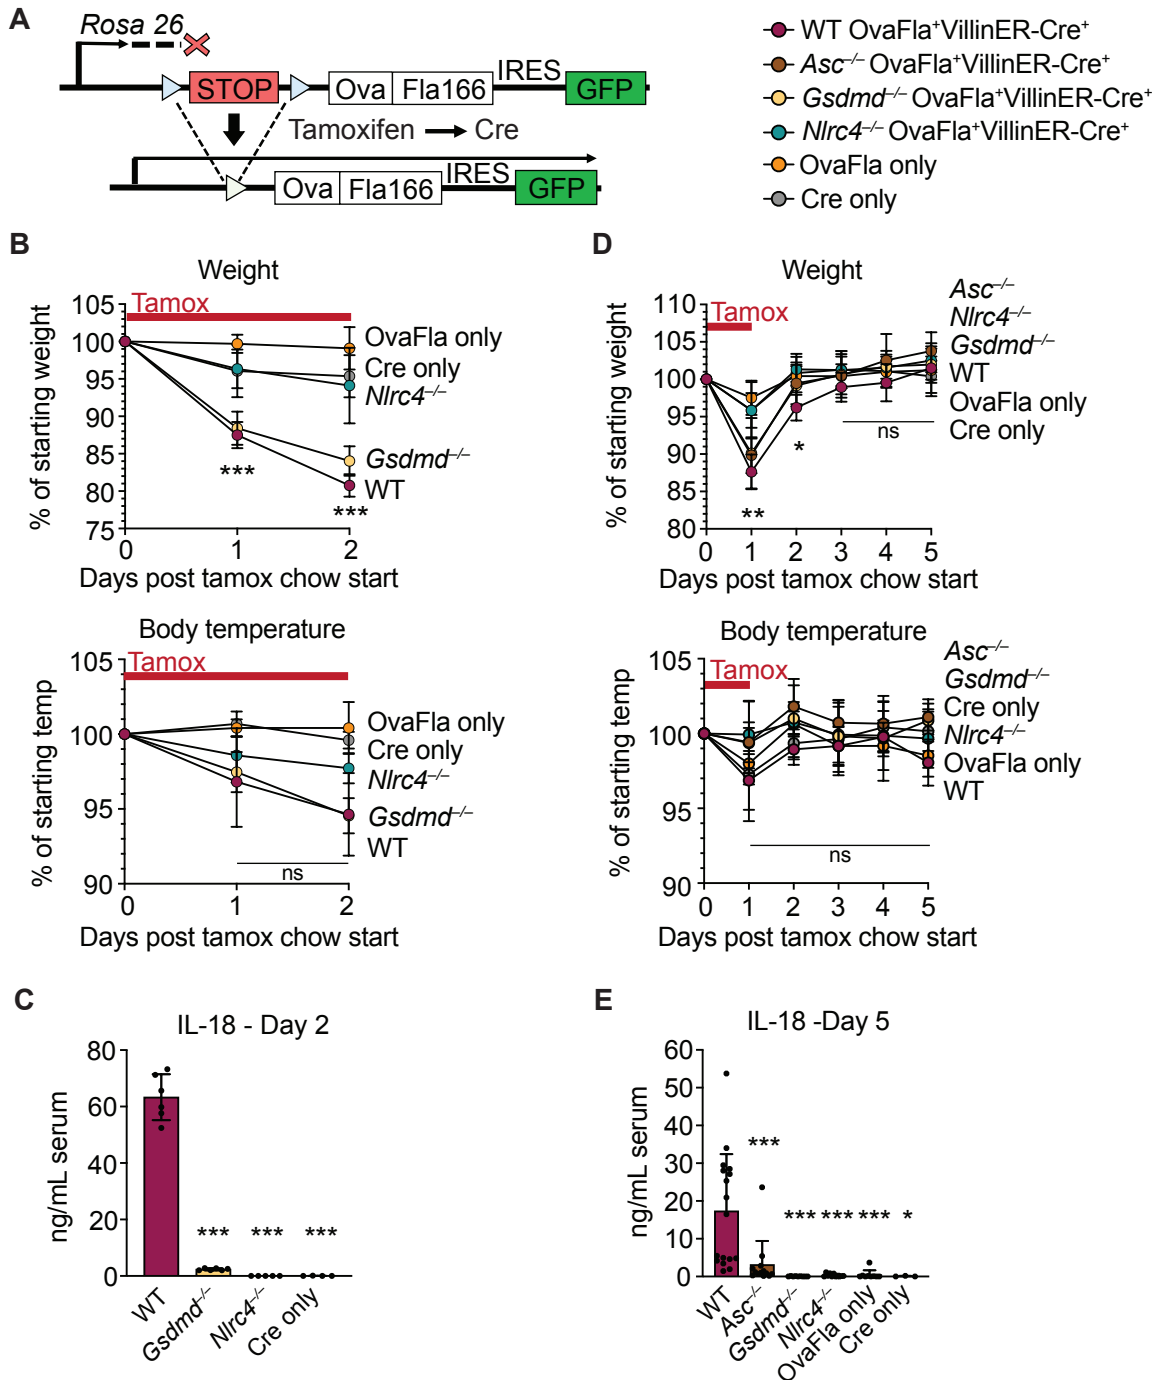

**Figure 1.** Genetic OvaFla VillinER-CreT2 system results in NAIP–NLRC4 activation in IECs of mice upon tamoxifen chow administration. **A.** Schematic of the OvaFla gene cassette on the Rosa 26 locus. The cassette contains full-length ovalbumin, flagellin with a C-terminal truncation at amino acid 166, and an IRES-GFP. When OvaFla mice are crossed to mice containing the tamoxifen-inducible VillinER-CreT2, tamoxifen administration results in Cre-controlled excision of the stop cassette and expression of the OvaFla fusion protein and GFP within IECs. **B.** Daily weight (top) and rectal temperature (bottom) measurements of OvaFla mice during a two-day course of tamoxifen chow (depicted as red bar). **C.** Quantification of IL-18 ELISA performed on serum from the mice shown in panel B at day 2 post tamoxifen chow start. Each dot represents an individual mouse. **D.** Daily weight (top) and rectal temperature (bottom) measurements of OvaFla mice following a single day pulse of tamoxifen chow (depicted as red bar). **E.** Quantification of IL-18 ELISA performed on serum from the mice shown in panel D at day 5 post tamoxifen chow start. Each dot represents an individual mouse. B-E, data shown as mean  $\pm$  SD. Significance calculated using one-way ANOVA and Tukey’s multiple comparisons test ( $*p < 0.05$ ,  $**p < 0.01$ ,  $***p < 0.001$ ). D, B,  $p$  values between WT and *Nlrc4*<sup>-/-</sup> are shown. C, E,  $p$  values between WT and other experimental groups are shown.

138 contaminants that activate TLR signaling (Nichols, 2017). Thus, to avoid confounding effects of  
139 TLR activation, and to isolate the specific effects of inflammasome activation, we administered  
140 tamoxifen orally through a commercially available tamoxifen-containing chow. OvaFla mice  
141 were fed *ab libitum*, and their weight and temperature were tracked daily as previously-described  
142 indicators of NAIP–NLRC4 activation (von Moltke et al., 2012). After a single day on the  
143 tamoxifen diet, WT OvaFla and *Gsdmd*<sup>-/-</sup> OvaFla mice lost a significant amount of weight, and  
144 by day two of the tamoxifen diet, these mice needed to be euthanized due to exceeding the  
145 humane weight loss endpoint on our animal protocol (Figure 1B, top). In contrast, the *Nlrc4*<sup>-/-</sup>  
146 OvaFla mice, as well as the OvaFla-only and Cre-only littermate control mice, maintained a  
147 consistent body weight and appeared healthy over the two-day time course. Although not  
148 statistically significant, the WT OvaFla and *Gsdmd*<sup>-/-</sup> OvaFla mice also exhibited decreases in  
149 core body temperature by day two relative to the *Nlrc4*<sup>-/-</sup> OvaFla mice (Figure 1B, bottom),  
150 consistent with previous analyses using recombinant flagellin protein (FlaTox) to induce acute  
151 NAIP–NLRC4 activation (Rauch et al., 2017; von Moltke et al., 2012).

152 Serum was collected from OvaFla mice at day two of the tamoxifen diet and assayed for  
153 IL-18, which is released from IECs following NAIP–NLRC4 activation (Rauch et al., 2017). The  
154 serum of WT OvaFla mice contained approximately 60 times more IL-18 than the serum of  
155 *Gsdmd*<sup>-/-</sup> OvaFla mice, demonstrating that gasdermin D is required for IL-18 release from IECs  
156 following NAIP–NLRC4 activation (Figure 1C). IL-18 was not detected in the *Nlrc4*<sup>-/-</sup> mice or  
157 in the OvaFla-only or Cre-only littermate controls. Taken together, these data show that the  
158 OvaFla system results in robust NAIP–NLRC4 activation in IECs following tamoxifen  
159 administration.

160 To study the CD8<sup>+</sup> T cell response to IEC-derived antigen following NAIP–NLRC4  
161 activation, we shortened the administration of tamoxifen chow to a single day pulse to limit  
162 confounding effects of morbidity in the NAIP–NLRC4 sufficient strains. We again monitored  
163 weight and rectal temperature each day. We found that while the WT, *Asc*<sup>-/-</sup>, and *Gsdmd*<sup>-/-</sup>  
164 OvaFla mice initially lost weight, weight loss was reversed by day three post tamoxifen chow  
165 start (Figure 1D, top). No significant difference in core body temperature was found between  
166 strains over the five-day experiment (Figure 1D, bottom).

167 Serum was collected at day five post start of the tamoxifen chow diet and again assayed  
168 for IL-18 through ELISA. Similar to the two-day tamoxifen pulse, a single day of tamoxifen  
169 chow resulted in significant IL-18 production in the WT OvaFla mice but minimal to no  
170 detectable IL-18 in the other OvaFla strains (Figure 1E). The WT mice exhibited heterogeneity  
171 in the IL-18 response with the single day chow pulse, which may be related to some mice being  
172 averse to consuming the tamoxifen chow (Chiang et al., 2010) or heterogeneity in the kinetics of  
173 the response.

174 We also performed immunofluorescence imaging of the small intestines of mice from  
175 each of the OvaFla lines at day two following the start of a single day pulse of tamoxifen chow.  
176 The presence of an IRES-GFP downstream of the *OvaFla* gene allows us to track the expression  
177 of the transgene. While approximately 30% of the IECs were GFP<sup>+</sup> in *Nlrc4*<sup>-/-</sup> OvaFla mice, only  
178 about 2% of the IECs were GFP<sup>+</sup> in the WT, *Asc*<sup>-/-</sup>, or *Gsdmd*<sup>-/-</sup> OvaFla mice at that time point  
179 (Figure 2). This result was anticipated because previous work (Rauch et al., 2017; Sellin et al.,  
180 2014) found that IECs are rapidly expelled from the epithelium upon NAIP–NLRC4 activation.  
181 Given that we observe robust IL-18 levels in the serum of WT mice (Figure 1C, E), we believe  
182 the transgene is expressed in WT mice, but NLRC4<sup>+</sup> cells that express high levels of the  
183 transgene will be expelled, limiting our ability to detect them. Although pyroptosis of IECs  
184 requires Gasdermin D, NAIP–NLRC4-induced IEC expulsion was previously found to be  
185 independent of Gasdermin D, likely due to the existence of an NLRC4–Caspase-8-dependent  
186 apoptosis pathway that also leads to IEC expulsion (Man et al., 2013; Rauch et al., 2017). These  
187 previous results are consistent with the apparent loss of GFP<sup>+</sup> cells we observe in the *Gsdmd*<sup>-/-</sup>  
188 OvaFla mice.

189 Taken together, these data show that OvaFla production under control of the tamoxifen-  
190 inducible Villin-Cre-ER<sup>T2</sup> system results in robust NAIP–NLRC4 activation in the IECs of mice.  
191 A single day pulse of tamoxifen chow leads to significant IL-18 production without gross  
192 morbidity or mortality in the NAIP–NLRC4 sufficient strains. Additionally, OvaFla likely  
193 accumulates in the IECs of the *Nlrc4*<sup>-/-</sup> OvaFla mice, as these cells do not undergo NAIP–  
194 NLRC4-driven cell expulsion.

195

### 196 **CD8<sup>+</sup> T cell activation by epithelial antigens**

197 We followed the response of Ova-specific TCR transgenic OT-I CD8<sup>+</sup> T cells following OvaFla  
198 induction in each of our mouse lines. Congenically marked (CD45.1<sup>+</sup> or CD45.1<sup>+</sup>CD45.2<sup>+</sup>) OT-I  
199 T cells were harvested from the spleens and mesenteric lymph nodes of OT-I *Rag2*<sup>-/-</sup> mice,  
200 labeled with CellTrace Violet proliferation dye, and intravenously transferred into the OvaFla  
201 mice (2×10<sup>4</sup> cells per mouse) (Figure 3A). Immediately following adoptive transfer, the mice  
202 were placed on tamoxifen chow for a single day. At day five post adoptive transfer, the mice  
203 were euthanized, and their mesenteric lymph nodes, which drain immune cells from the  
204 intestines (Esterhazy et al., 2019), and spleens were analyzed for OT-I T cell proliferation and  
205 activation.

206 A dividing OT-I population was identified by flow cytometry in each Cre<sup>+</sup> OvaFla line  
207 (Figure 3–figure supplement 1A, 1B). These data demonstrate that antigens expressed in IECs  
208 can be processed and presented to activate CD8<sup>+</sup> T cells *in vivo*. Surprisingly, however, there  
209 was minimal difference in the relative percent (Figure 3B), absolute number (Figure 3C), or



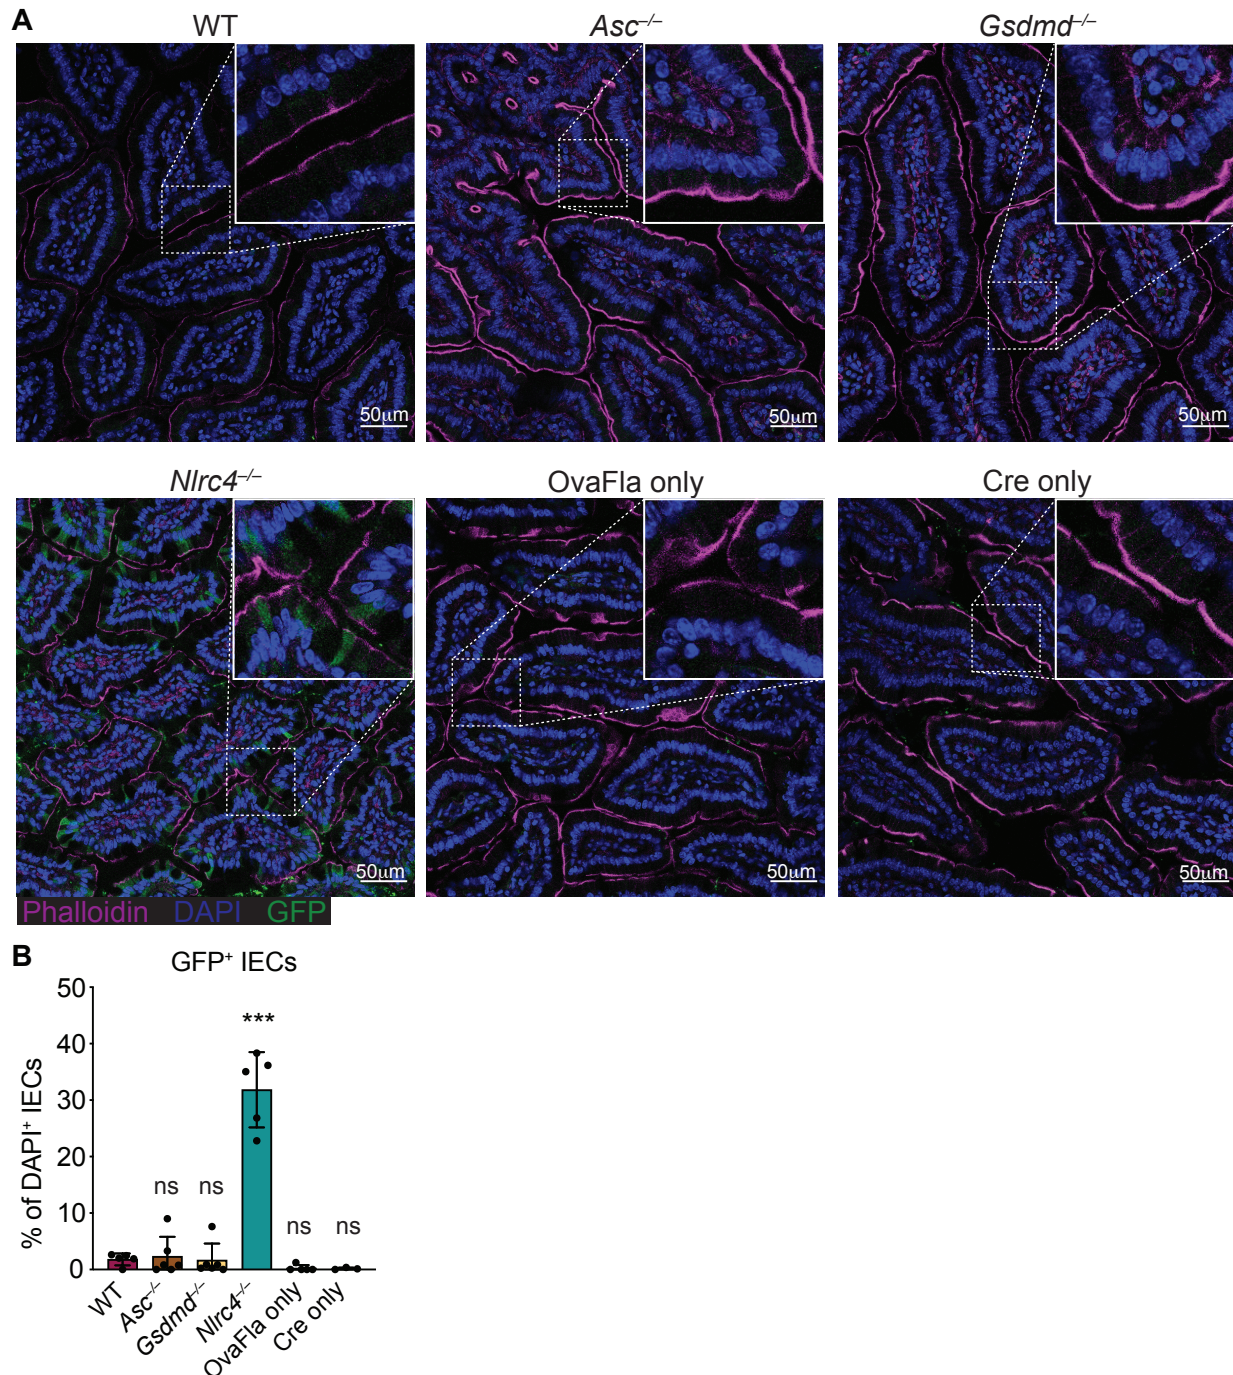

**Figure 2.** GFP<sup>+</sup> cells accumulate in *Nlrc4*<sup>-/-</sup> mice following tamoxifen administration. **A.** Representative immunofluorescence images of the small intestines of indicated OvaFla mice on day 2 following a single day pulse of tamoxifen chow. **B.** Quantification of DAPI<sup>+</sup> IECs that are also GFP<sup>+</sup> for each OvaFla line. Data are from two independent experiments, and each dot represents an individual mouse. Data shown as mean $\pm$ SD. Significance calculated using one-way ANOVA and Tukey's multiple comparisons test ( $*p < 0.05$ ,  $**p < 0.01$ ,  $***p < 0.001$ ). Only  $p$  values between WT and other experimental groups are shown.

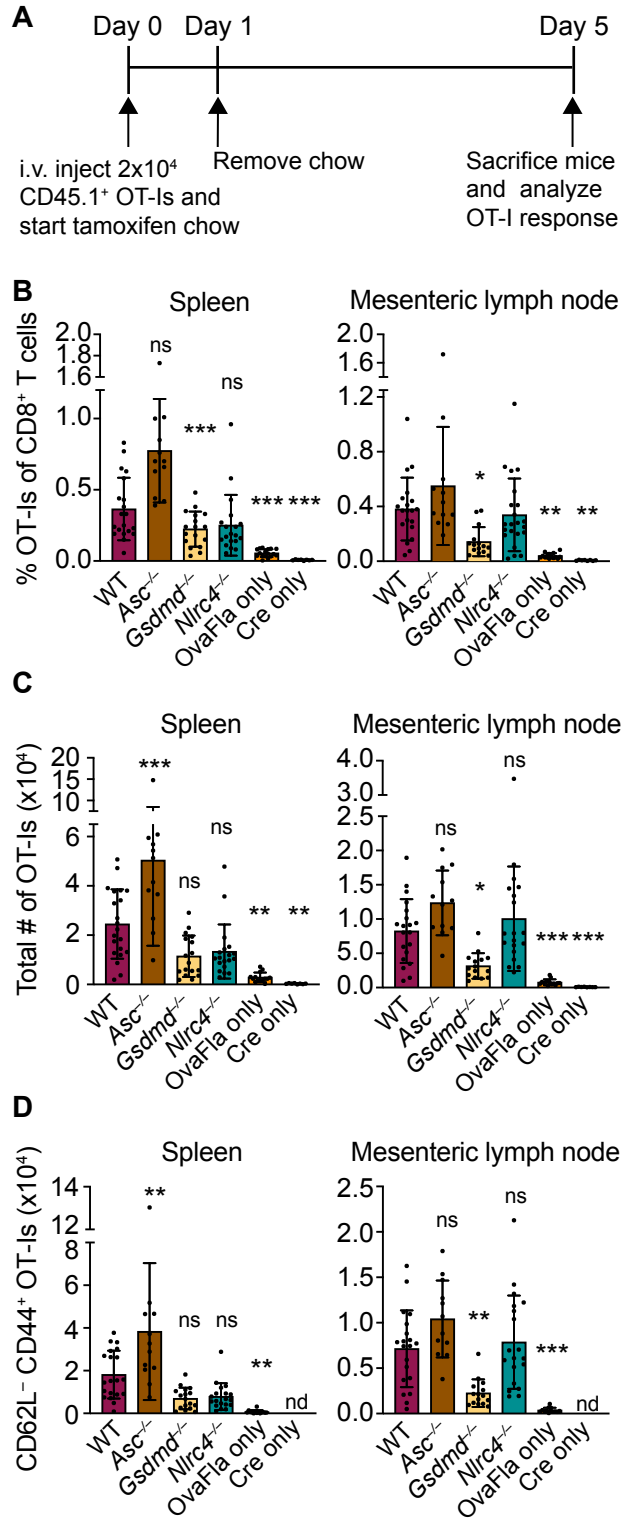

**Figure 3.** OvaFla expression in IECs results in OT-I proliferation and activation that is independent of ASC and NLRC4 but partially dependent on gasdermin D. **A.** Overview of experimental setup for analyzing OT-I responses to OvaFla production in IECs. **B.** Quantification of OT-I cells as a percent of total CD8<sup>+</sup> T cells per spleen (left) and mesenteric lymph node (right). **C.** Total number of OT-I cells per spleen (left) and mesenteric lymph node (right). **D.** Total number of CD62L<sup>-</sup>CD44<sup>+</sup> OT-I cells per spleen (left) and mesenteric lymph node (right). B-D, data are from three independent experiments, and each dot represents an individual mouse. Data shown as mean  $\pm$  SD. Significance calculated using one-way ANOVA and Tukey's multiple comparisons test (\* $p < 0.05$ , \*\* $p < 0.01$ , \*\*\* $p < 0.001$ ). Only  $p$  values between WT and other experimental groups are shown.

210 activation status (defined as CD62L-CD44<sup>+</sup>)(Figure 3D, Figure 3–figure supplement 1C, D) of  
211 OT-I T cells between the WT and *Nlrc4*<sup>-/-</sup> OvaFla mice in either the spleen or mesenteric lymph  
212 node. In fact, relative to the WT OvaFla mice, a higher percent of the OT-I T cells in the *Nlrc4*<sup>-/-</sup>  
213 OvaFla mice produced IFN $\gamma$  and TNF $\alpha$  following *ex vivo* stimulation with PMA and ionomycin  
214 (Figure 3–figure supplement 1E). These data indicate OT-I T cells respond to IEC-expressed  
215 Ova in a manner that is independent of NAIP–NLRC4 activation. However, the specific lack of  
216 IEC expulsion and the resulting higher accumulation of antigen in IECs in *Nlrc4*<sup>-/-</sup> mice (Figure  
217 2) means that the WT and *Nlrc4*<sup>-/-</sup> mice are not truly comparable.

218 In contrast to *Nlrc4*<sup>-/-</sup> IECs, both *Asc*<sup>-/-</sup> and *Gsdmd*<sup>-/-</sup> IECs are expelled after  
219 inflammasome activation and thus exhibit similarly low OvaFla-IRES-GFP transgene expression  
220 in IECs as seen in WT mice (Figure 2). Both strains are also defective for IL-18 release (Figures  
221 1C, 1E). The major difference between the two strains is that *Asc*<sup>-/-</sup> cells can still undergo  
222 *Gsdmd*-dependent pyroptosis, whereas *Gsdmd*<sup>-/-</sup> cells do not undergo lytic pyroptosis but are  
223 nevertheless expelled from the epithelium as intact apoptotic cells, likely via a Caspase-1 and/or  
224 -8 pathway (Man et al., 2013; Rauch et al., 2017). There was little difference in OT-I numbers  
225 (Figures 3B, 3C) or activation (Figure 3D, Figure 3–figure supplement 1C, D), as well as no  
226 difference in IFN $\gamma$  and TNF $\alpha$  production (Figure 3–figure supplement 1E), between the WT  
227 OvaFla mice and the *Asc*<sup>-/-</sup> OvaFla mice. However, we were surprised to observe partial deficits  
228 in OT-I responses in *Gsdmd*<sup>-/-</sup> OvaFla mice relative to the other mouse lines (Figures 3B-D,  
229 Figure 3–figure supplement 1D), though the deficits were not statistically significant for all  
230 parameters measured. Thus, these results suggest inflammasome activation in IECs is not  
231 essential for OT-I CD8<sup>+</sup> T cell activation, yet Gasdermin D-mediated pyroptosis of IECs may  
232 play a partial role (see Discussion).

233

### 234 **Cross-presentation of IEC antigens**

235 IECs express MHC class I on their surface and are capable of directly presenting antigen to  
236 CD8<sup>+</sup> T cells (Christ & Blumberg, 1997; Nakazawa et al., 2004). It is therefore possible that the  
237 OT-I activation seen in the OvaFla mice is a result of direct presentation of Ova peptide by the  
238 IECs expressing OvaFla. However, it is also possible that the OT-I T cells are being cross-  
239 primed by cDC1s that engulf and “cross present” the IEC-derived Ova (Cerovic et al., 2015; Z.  
240 Liu & Lefrancois, 2004). The fate of IEC-derived antigens and the role of antigen-presentation  
241 pathways leading to CD8<sup>+</sup> T cell activation has not previously been addressed with a completely  
242 *in vivo* system that can genetically distinguish cross from direct presentation of IEC antigens.

243 To determine whether the OT-IIs are being activated through cross presentation or direct  
244 presentation of Ova peptide, we took advantage of the H-2K<sup>bm1</sup> mouse model that contains a  
245 seven base pair mutation in the gene encoding K<sup>b</sup> (Schulze et al., 1983). The bm1 mutation



246 renders K<sup>b</sup> unable to bind the Ova-derived OT-I agonist peptide, SIINFEKL (Nikolic-Zugic &  
247 Bevan, 1990). We bred H-2K<sup>bm1</sup> mice to each of our OvaFla lines to establish mice that make  
248 OvaFla in their IECs but are incapable of directly presenting the SIINFEKL peptide (H-2K<sup>bm1+</sup>  
249 OvaFla mice, referred to here as bm1<sup>+</sup> OvaFla mice). We then generated bone marrow chimeras  
250 using bm1<sup>+</sup> OvaFla mice as lethally irradiated recipients that were reconstituted with WT H-2K<sup>b</sup>  
251 bone marrow from B6 CD45.1 donors (Figure 4A, left). In these chimeras, the IECs produce  
252 OvaFla following tamoxifen administration, but the IECs themselves are unable to present  
253 SIINFEKL to OT-I T cells. The donor-derived hematopoietic cells, including cross-presenting  
254 cDC1s, do not contain the *OvaFla* gene cassette but are able to cross-present the SIINFEKL  
255 peptide if they acquire it from IECs (Figure 4A, right). Therefore, in the bm1<sup>+</sup>OvaFla chimeras,  
256 we will only see OT-I proliferation and activation if the SIINFEKL peptide is cross-presented.

257 Eight to ten weeks after lethal irradiation and reconstitution, bm1<sup>+</sup> OvaFla mice received  
258 2×10<sup>4</sup> CD45.1<sup>+</sup> CD45.2<sup>+</sup> CellTrace Violet labeled OT-I T cells intravenously and were given a  
259 one-day pulse of tamoxifen chow (Figure 4A, left). The mice were euthanized at day five post  
260 OT-I transfer, and their spleens and mesenteric lymph nodes were analyzed for OT-I  
261 proliferation and activation. Serum was also collected for IL-18 ELISA to confirm NAIP–  
262 NLRC4-dependent IL-18 release following OvaFla induction (Figure 4–figure supplement 1A).

263 Like the non-chimera experiments, an obvious, dividing and activated OT-I population  
264 was observed by flow cytometry in each of the OvaFla mouse lines (Figures 4B, C, Figure 4–  
265 figure supplement 1B, C). This population was absent in mice given H-2K<sup>bm1</sup> bone marrow  
266 (Figure 4–figure supplement 2), confirming the requirement for APCs to express K<sup>b</sup> to activate  
267 OT-I T cells. These data provide formal genetic evidence that IEC-derived antigens can be cross-  
268 presented to activate CD8<sup>+</sup> T cells *in vivo*.

269 In the spleen, the bm1<sup>+</sup> WT and bm1<sup>+</sup> *Nlrc4*<sup>-/-</sup> OvaFla mice harbored significantly more  
270 OT-I T cells than the bm1<sup>+</sup> *Gsdmd*<sup>-/-</sup> OvaFla mice, or the bm1<sup>+</sup> OvaFla-only and bm1<sup>+</sup> Cre-only  
271 littermate controls, by both percent (Figure 4B, left) and total number (Figure 4B, middle). There  
272 were also significantly more activated (CD62L-CD44<sup>+</sup>) OT-I T cells in the spleens of bm1<sup>+</sup> WT  
273 mice as compared to bm1<sup>+</sup> *Gsdmd*<sup>-/-</sup> mice (Figure 4B, left, Figure 4–figure supplement 1C). In  
274 the mesenteric lymph nodes, the relative percent (Figure 4C, left) total number (Figure 4C,  
275 middle), and number of activated (Figure 4C, right, Figure 4–figure supplement 1C) OT-I T cells  
276 in the bm1<sup>+</sup> WT OvaFla mice trended higher than the bm1<sup>+</sup> *Gsdmd*<sup>-/-</sup> mice and the controls, but  
277 was not statistically significant. The reason for the weak responses in the mesenteric lymph  
278 nodes is unclear, but others have previously noted negative impacts in irradiation chimeras on  
279 the expansion of adoptively transferred OT-I T cells (Kurts, Kosaka, Carbone, Miller, & Heath,  
280 1997). There was no difference across the genotypes in the percent of cells that produce IFN $\gamma$   
281 and TNF $\alpha$  following *ex vivo* stimulation with PMA and ionomycin (Supp fig 2D).



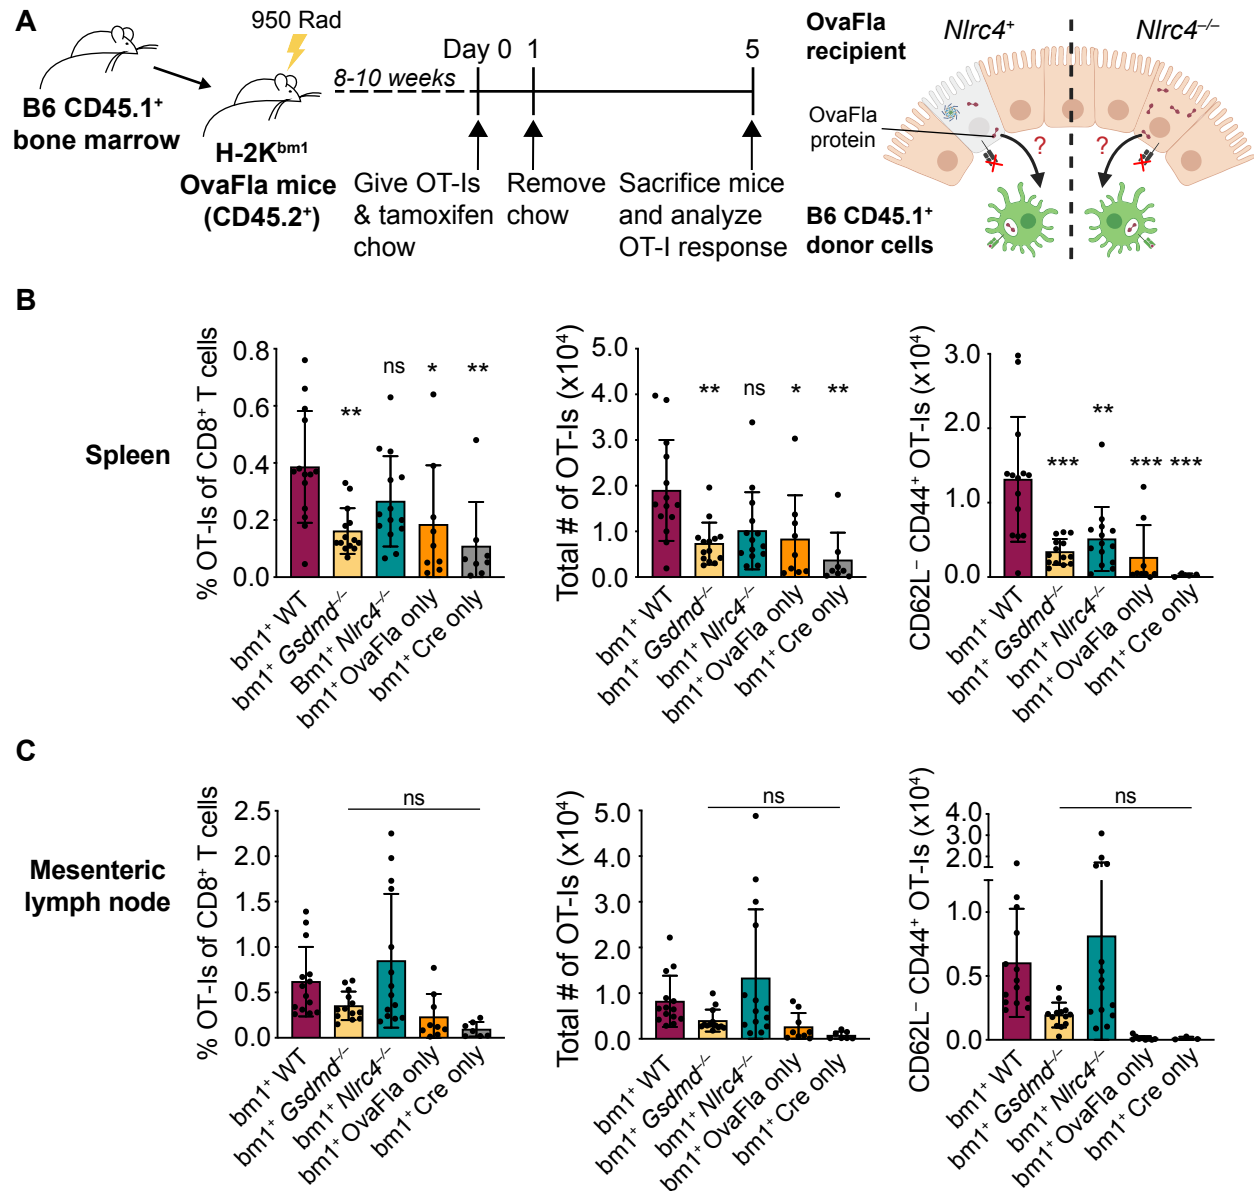

**Figure 4.** OvaFla expression in IECs results in OT-I cross-priming that is independent of NLRC4 but partially dependent on gasdermin D. **A.** Schematic depicting the production and analysis workflow of chimeric  $bm1^+$  OvaFla mice (left). At the right, an illustration of either  $bm1^+$  WT OvaFla mice (left of the dashed line) or  $bm1^+$  *Nlrc4*<sup>-/-</sup> OvaFla mice (right of the dashed line) following lethal irradiation and reconstitution with bone marrow from B6.SJL mice. **B.** Quantification of OT-I as a percent of total CD8<sup>+</sup> T cells (left), the total number of OT-I (middle), and the total number of CD64L-CD44<sup>+</sup> OT-I (right) in the spleen. **C.** Quantification of OT-I as a percent of total CD8<sup>+</sup> T cells (left), the total number of OT-I (middle), and the total number of CD64L-CD44<sup>+</sup> OT-I (right) in the mesenteric lymph nodes. B-C, data are from three independent experiments, and each dot represents an individual mouse. Data shown as mean  $\pm$  SD. Significance calculated using one-way ANOVA and Tukey's multiple comparisons test (\* $p < 0.05$ , \*\* $p < 0.01$ , \*\*\* $p < 0.001$ ). Only  $p$  values between WT and other experimental groups are shown.

282 Taken together, these data provide genetic evidence that OT-I T cells are cross-primed  
283 from IEC-derived antigen following OvaFla induction. This cross-priming does not strictly  
284 require NAIP–NLRC4 activation but Gasdermin D-induced pyroptosis can promote CD8<sup>+</sup> T cell  
285 responses, at least for splenic OT-I T cells.

286

### 287 **Pyroptotic cell antigens are cross-presented independent of *Batf3*<sup>+</sup> cDC1s**

288 *Batf3* is a transcription factor required for development of cDC1s (Edelson et al., 2010), and  
289 previous work showed that *ex vivo* isolated cDC1s can cross-prime CD8<sup>+</sup> T cells with IEC-  
290 derived antigen (Cerovic et al., 2015). To investigate whether the cross-priming of IEC-derived  
291 antigen occurring in the OvaFla mice requires cDC1 cells, we took advantage of our H-2K<sup>bm1</sup>  
292 bone marrow chimera system and compared *bm1*<sup>+</sup> OvaFla recipients that received either B6  
293 CD45.1 bone marrow or bone marrow from *Batf3*<sup>-/-</sup> mice.

294 As with the above experiments, bone marrow chimeras were made by lethally irradiating  
295 *bm1*<sup>+</sup> OvaFla mice and transferring donor bone marrow from either B6 CD45.1 or *Batf3*<sup>-/-</sup>  
296 donors. Eight to ten weeks post irradiation, 2×10<sup>4</sup> CD45.1<sup>+</sup> CD45.2<sup>+</sup> CellTrace Violet labeled  
297 OT-I T cells were adoptively transferred intravenously, and the mice were given a one-day pulse  
298 of tamoxifen chow (as in Figure 4A, left). The mice were sacrificed five days later, and their  
299 spleens and mesenteric lymph nodes were analyzed for OT-I proliferation and activation. We  
300 confirmed an absence of cDC1 cells in the OvaFla mice that received *Batf3*<sup>-/-</sup> donor bone  
301 marrow (Figure 5A, Figure 5–figure supplement 1).

302 To our surprise, there was no difference in the relative (Figures 5B-C, top) or total  
303 (Figures 5B-C, middle) number of OT-I T cells between *bm1*<sup>+</sup> WT OvaFla mice that received B6  
304 CD45.1 or *Batf3*<sup>-/-</sup> bone marrow in either the spleen or mesenteric lymph node. OT-I T cells in  
305 these two mouse groups also appeared to proliferate similarly (Figure 5D, Figure 5–figure  
306 supplement 2). Additionally, there was no difference in the percent (Figure 5–figure supplement  
307 3) or total number (Figures 5B-5C, bottom) of CD44<sup>+</sup> CD62L<sup>-</sup> OT-I T cells between these two  
308 groups. These data suggest a *Batf3*-independent population of DCs are responsible for cross-  
309 presentation of IEC-derived antigen following NAIP–NLRC4 activation.

310 The above findings with WT OvaFla mice are in stark contrast to the *Nlrc4*<sup>-/-</sup> OvaFla  
311 mice, which exhibit a significant decrease in the relative (Figures 5B-C, top) and total (Figures  
312 5B-C, middle) number of OT-I T cells in the spleens and mesenteric lymph nodes of mice that  
313 received *Batf3*<sup>-/-</sup> donor cells compared to the mice that received B6 CD45.1 donor cells.  
314 Correspondingly, there was a significant decrease in the total number of CD44<sup>+</sup> CD62L<sup>-</sup> OT-I T  
315 cells (Figures 5B-C, bottom). The difference in OT-I numbers between these two groups of mice  
316 may be related to a relative decrease in proliferation of the OT-I T cells in the mice receiving  
317 *Batf3*<sup>-/-</sup> bone marrow, as evidenced by less dilution of the CellTrace Violet dye (Figure 5D,

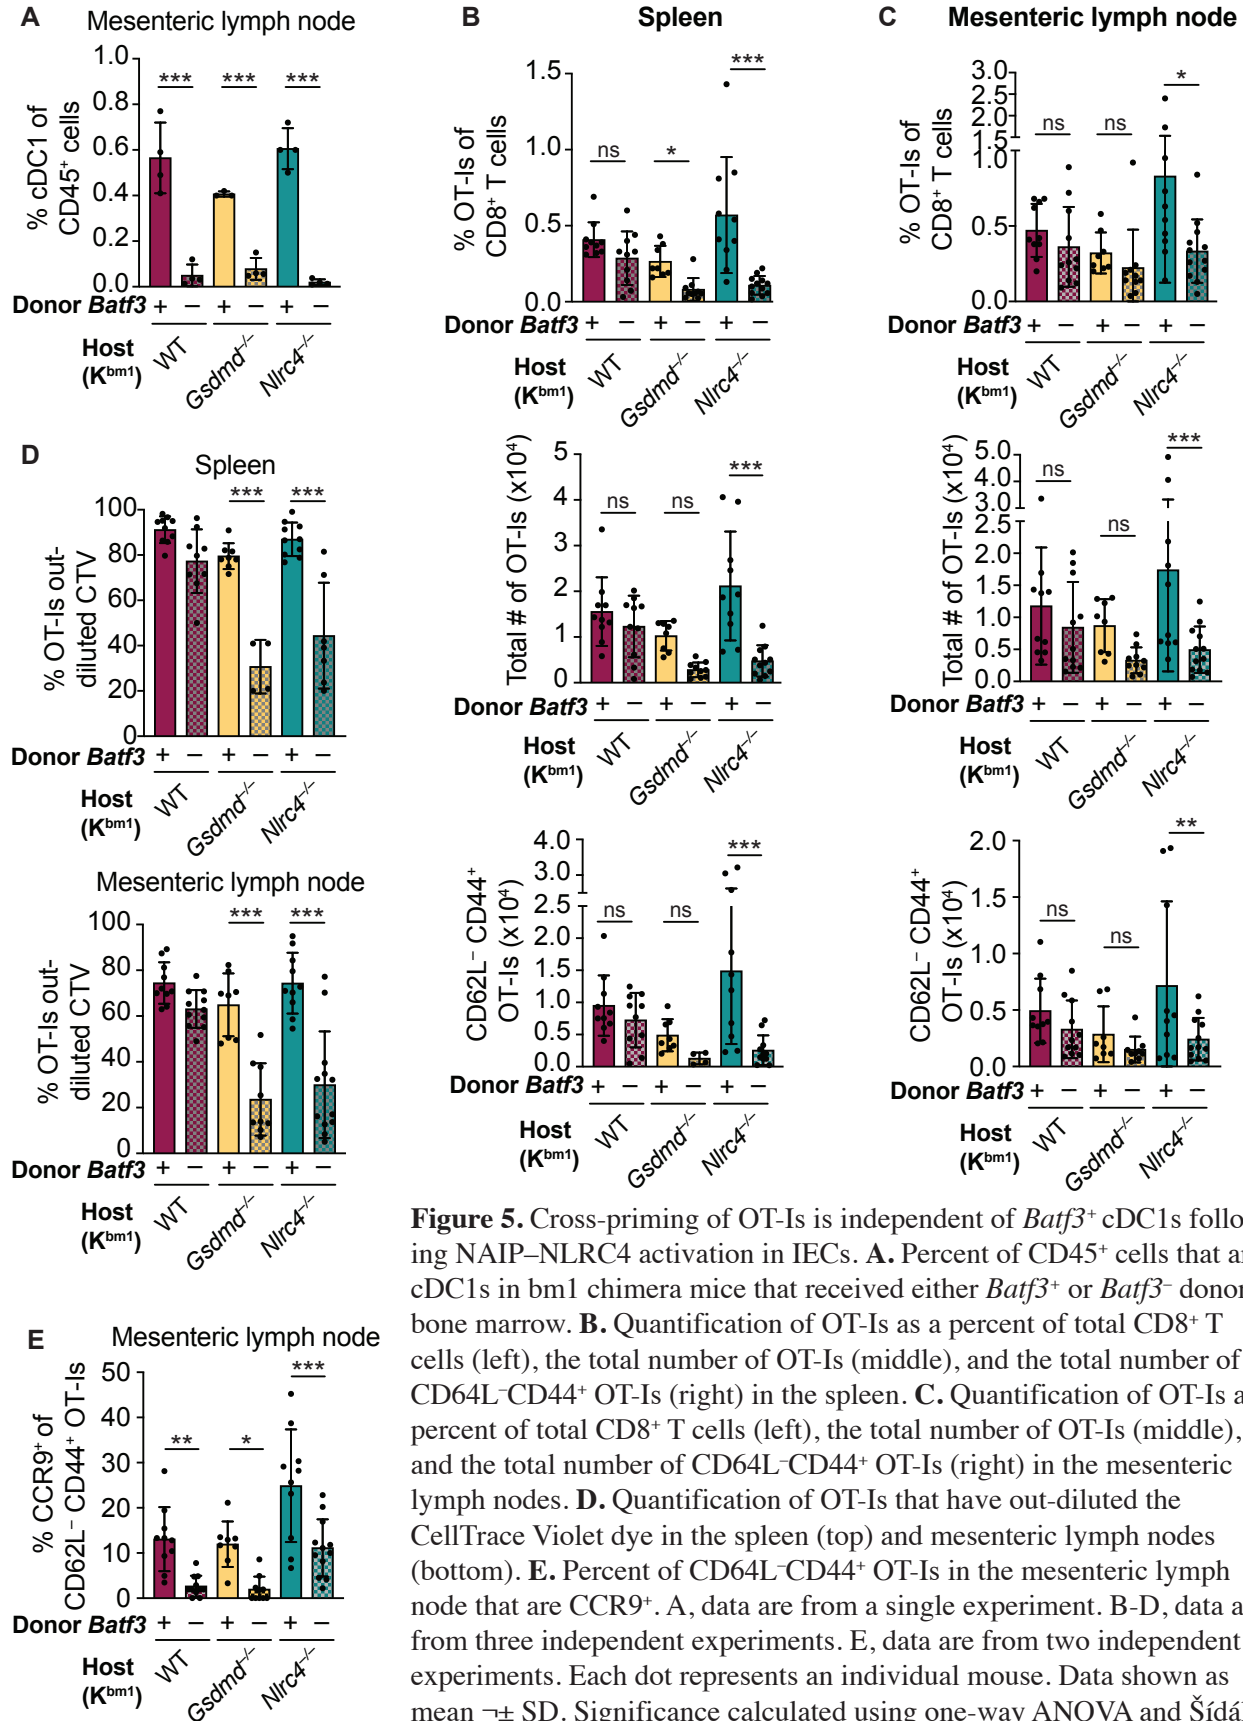

**Figure 5.** Cross-priming of OT-Is is independent of *Batf3*<sup>+</sup> cDC1s following NAIP–NLRC4 activation in IECs. **A.** Percent of CD45<sup>+</sup> cells that are cDC1s in *bm1* chimera mice that received either *Batf3*<sup>+</sup> or *Batf3*<sup>-</sup> donor bone marrow. **B.** Quantification of OT-Is as a percent of total CD8<sup>+</sup> T cells (left), the total number of OT-Is (middle), and the total number of CD64L-CD44<sup>+</sup> OT-Is (right) in the spleen. **C.** Quantification of OT-Is as a percent of total CD8<sup>+</sup> T cells (left), the total number of OT-Is (middle), and the total number of CD64L-CD44<sup>+</sup> OT-Is (right) in the mesenteric lymph nodes. **D.** Quantification of OT-Is that have out-diluted the CellTrace Violet dye in the spleen (top) and mesenteric lymph nodes (bottom). **E.** Percent of CD64L-CD44<sup>+</sup> OT-Is in the mesenteric lymph node that are CCR9<sup>+</sup>. A, data are from a single experiment. B–D, data are from three independent experiments. E, data are from two independent experiments. Each dot represents an individual mouse. Data shown as mean  $\pm$  SD. Significance calculated using one-way ANOVA and Šídák’s multiple comparisons test (\* $p$  < 0.05, \*\* $p$  < 0.01, \*\*\* $p$  < 0.001).

318 Figure 5–figure supplement 2). Taken together these data indicate that in the absence of NLRC4-  
319 inflammasome activation, efficient cross-presentation of IEC-derived antigen *in vivo* requires  
320 cDC1s, but that this requirement is circumvented in the presence of NLRC4 activation.

321 NLRC4 activation might promote alternative (cDC1-independent) cross-presentation  
322 pathways by the pyroptotic release of antigen and/or inflammatory cytokines. To test whether  
323 Gasdermin D is required for cDC1-independent cross-priming, we examined  $bm1^+Gsdmd^{-/-}$   
324 chimeras reconstituted with  $Batf3^+$  or  $Batf3^{-/-}$  bone marrow. The  $bm1^+Gsdmd^{-/-}$  OvaFla mice  
325 exhibit a phenotype that falls between the  $bm1^+$  WT and  $bm1^+Nlrc4^{-/-}$  OvaFla mice, with the  
326 only significant differences between WT and  $Batf3^{-/-}$  bone marrow recipients in the division of  
327 OT-I T cells (Figure 5D, Figure 5–figure supplement 2) and relative percent of OT-I T cells in  
328 the spleen (Figure 5B, top). These data suggest that cross-priming of OT-I T cells is largely  
329 dependent on  $Batf3^+$  cDC1s in the absence of NAIP–NLRC4 activation, but NAIP–NLRC4  
330 activation reveals a  $Batf3$ -independent cross-presentation pathway.

331 Regardless of the bone marrow donor, OT-I T cells in the  $bm1^+$  WT,  $bm1^+Gsdmd^{-/-}$ , and  
332  $bm1^+Nlrc4^{-/-}$  OvaFla mice all showed similar levels of TNF $\alpha$  and IFN $\gamma$  production following *ex*  
333 *vivo* stimulation with PMA and ionomycin (Figure 5–figure supplement 3B). However, when we  
334 looked at CCR9 expression as a readout of whether the OT-I T cells were homing to the intestine  
335 (Svensson et al., 2002), we found a significant decrease in the number of cells expressing CCR9  
336 in the  $Batf3^{-/-}$  recipients relative to the B6 CD45.1 recipients across all three mouse lines (Figure  
337 5E). In summary, our data indicate the existence of two potential pathways by which IEC-  
338 derived antigens are cross-presented to CD8 $^+$  T cells: one that requires  $Batf3^+$  cDC1s, and one  
339 that does not. However, the  $Batf3^+$  cDC1s appear necessary for instructing antigen specific CD8 $^+$   
340 T cells back to the intestine.

341

## 342 Discussion

343

344 Intestinal epithelial cells (IECs) represent an important barrier surface that protects against  
345 enteric pathogens. At the same time, IECs also represent a potential replicative niche for  
346 pathogens. As such, the immune system must survey IECs for foreign antigens and present those  
347 antigens to activate protective adaptive immune responses. In general, it remains poorly  
348 understood whether and how IEC-derived antigens are presented to activate T cell responses. In  
349 particular, the relative contributions of direct versus cross-presentation of IEC antigens to CD8 $^+$   
350 T cells has not been thoroughly investigated. Here we employed a genetic system that inducibly  
351 expresses a model antigen (ovalbumin) fused to a NAIP–NLRC4 agonist (flagellin) within the  
352 cytosol of cells (Nichols et al., 2017). We crossed these “OvaFla” mice to Villin-Cre-ER $T^2$  mice,  
353 allowing for tamoxifen-inducible expression specifically in IECs. By additionally crossing to an

354 H-2K<sup>bm1</sup> background (Nikolic-Zugic & Bevan, 1990; Schulze et al., 1983), and using the  
355 resulting mice as irradiated recipients for wild-type K<sup>b</sup> hematopoietic donor cells, we engineered  
356 a system in which an IEC-derived ovalbumin antigen (SIINFEKL) cannot be directly presented  
357 to OT-I T cells but can still be acquired by hematopoietic cells and cross-presented. Using this  
358 system, we established *in vivo* that there is an antigen-presentation pathway in which IEC-  
359 derived antigens are cross-presented to activate CD8<sup>+</sup> T cells. This finding extends previous  
360 work indicating that *ex vivo* isolated DCs can cross present IEC-derived antigens to CD8<sup>+</sup> T cells  
361 (Cerovic et al., 2015; Cummings et al., 2016). We show these antigens can activate antigen-  
362 specific CD8<sup>+</sup> T cells *in vivo*, and that this activation can occur even when direct presentation is  
363 genetically eliminated. We suggest that the cross-presentation pathway revealed by our analyses  
364 could be of importance during infection with pathogens that replicate in IECs, though future  
365 studies will be required to evaluate this.

366 Our genetic system also allowed us to assess the contribution of IEC inflammasome  
367 activation to the adaptive immune response. Inflammasomes are a critical component of the  
368 innate immune response to many pathogens, and their activation is known to influence adaptive  
369 immunity (Deets & Vance, 2021). However, in previous studies, it has been difficult to isolate  
370 the specific effects of inflammasome activation on adaptive immunity because microbial  
371 pathogens activate numerous innate immune signaling pathways over the course of an infection.  
372 By providing a genetically encoded antigen and inflammasome stimulus, we were able to  
373 overcome this issue and specifically address the role of inflammasomes in adaptive CD8<sup>+</sup> T cell  
374 responses *in vivo*. We crossed our OvaFla Villin-Cre-ER<sup>T2</sup> mice to mice deficient in key  
375 inflammasome components. Consistent with previous work, we found that *Nlr4*<sup>-/-</sup> mice entirely  
376 lack the inflammasome response to cytosolic flagellin, whereas *Asc*<sup>-/-</sup> mice are defective for IL-  
377 18 release but not pyroptotic cell death or IEC expulsion (Rauch et al., 2017) (Figures 1C, 1E,  
378 2B). We also crossed OvaFla Villin-Cre-ER<sup>T2</sup> mice to pyroptosis-deficient *Gsdmd*<sup>-/-</sup> mice and  
379 found that they were defective for IL-18 release *in vivo* (Figures 1C, 1E).

380 Because *Nlr4*<sup>-/-</sup> IECs fail to undergo pyroptosis or IEC expulsion (Rauch et al., 2017),  
381 we noted that cells expressing the OvaFla transgene accumulate to much higher levels in the  
382 *Nlr4*<sup>-/-</sup> mice than in WT, *Asc*<sup>-/-</sup>, or *Gsdmd*<sup>-/-</sup> mice, in which IEC expulsion still occurs (Figure  
383 2). Higher levels of Ova antigen in IECs has previously found to correlate with higher levels of  
384 OT-I expansion in the spleen and mesenteric lymph nodes of mice (Vezy, Olson, & Lefrancois,  
385 2000). Because of the differences in antigen burden, comparisons of *Nlr4*<sup>-/-</sup> mice to the other  
386 genotypes must be made with caution. Nevertheless, we found that OT-I T cells in the *Nlr4*<sup>-/-</sup>  
387 OvaFla mice divide and are activated at similar levels to the WT OvaFla mice following  
388 tamoxifen administration (Figure 3B-D). This activation occurred even when direct presentation  
389 of the OT-I peptide by IECs was eliminated on the K<sup>bm1</sup> background (Figure 4B-C). These



390 results are surprising for two reasons. First, it is not clear how IEC-derived antigens would be  
391 delivered to APCs in the absence of inflammasome-induced cell death. Other studies have  
392 suggested that IEC apoptosis, which may occur during homeostatic IEC turnover (Bullen et al.,  
393 2006; Hall, Coates, Ansari, & Hopwood, 1994; Marshman, Ottewell, Potten, & Watson, 2001;  
394 Shibahara et al., 1995; Watson et al., 2005), can be a source of antigen for T cell activation  
395 (Cummings et al., 2016; Huang et al., 2000). However, apoptotic IECs are expelled apically into  
396 the intestinal lumen (Bullen et al., 2006; Hall et al., 1994; Marshman et al., 2001; Shibahara et  
397 al., 1995; Watson et al., 2005), and so the exact mechanism of basolateral antigen delivery  
398 remains unclear—though it may involve luminal sampling by intestinal phagocytes (Farache et  
399 al., 2013) and/or the transfer of plasma membrane components (trocytosis) (Dance, 2019).  
400 Cummings *et al* suggested that IECs can be engulfed by APCs, resulting in antigen presentation  
401 on MHC class II to induce CD4<sup>+</sup> T regulatory cells, but this work did not examine antigen-  
402 specific responses or MHC class I presentation to CD8<sup>+</sup> T cells. Further work is therefore needed  
403 to understand mechanisms of IEC-derived antigen presentation in the absence of inflammatory  
404 cell death. The second reason we were surprised to see CD8<sup>+</sup> T cell activation in *Nlr4*<sup>-/-</sup> OvaFla  
405 mice is that these mice are presumably unable to produce inflammatory signals necessary to  
406 induce APC activation. However, previous studies have shown that OT-I T cells can be activated  
407 from constitutively expressed Ova in the absence of inflammation. In this scenario, the CD8<sup>+</sup> T  
408 cells go on to become anergic and are likely eventually deleted from the periphery (Kurts et al.,  
409 1996; Kurts et al., 1997; W. Liu, Evanoff, Chen, & Luo, 2007; Vezys et al., 2000).

410 Since WT, *Asc*<sup>-/-</sup>, and *Gsdmd*<sup>-/-</sup> IECs all undergo cell death and IEC expulsion in  
411 response to NLRC4 activation, these mice exhibit similar levels of OvaFla transgene expression  
412 in IECs, allowing for comparisons between these mouse strains. We found that OvaFla  
413 production leads to CD8<sup>+</sup> T cell expansion and activation in all these strains. The expansion is at  
414 least partially dependent on gasdermin D, as *Gsdmd*<sup>-/-</sup> OvaFla mice have significantly fewer OT-  
415 I T cells than their WT counterparts (Figure 3B, C). Interestingly, ASC-deficient OvaFla mice—  
416 in which IECs still undergo pyroptosis following NAIP–NLRC4 activation (Rauch et al.,  
417 2016)—show similar, or even increased, OT-I numbers in their tissues relative to WT OvaFla  
418 mice. These data, combined with the fact that *Gsdmd*<sup>-/-</sup> and *Asc*<sup>-/-</sup> OvaFla mice have little to no  
419 detectable IL-18 in their serum (Figures 1C, 1E), suggest that the difference in OT-I T cell  
420 proliferation between these strains is in some way related to pyroptotic antigen release. One  
421 hypothesis is that the gasdermin D pore, which has been shown to provide a lysis-independent  
422 portal for IL-1 $\beta$ , IL-18, and other small proteins (DiPeso et al., 2017; Evavold et al., 2018; Heilig  
423 et al., 2018), may act as a channel for small antigens to escape IECs prior to cell expulsion.

424 Because *Gsdmd*-deficiency only modestly affected OT-I responses, our data additionally  
425 suggest that there may both GSDMD-dependent and GSDMD-independent pathways by which

426 IEC antigens can be cross presented to CD8<sup>+</sup> T cells. Because *Batf3*<sup>-/-</sup>-dependent cDC1s have a  
427 known role in cross-presenting IEC-derived antigen (Cerovic et al., 2015), we sought to  
428 determine if the cross presentation occurring in the OvaFla mice similarly relied on these cells.  
429 We compared bm1<sup>+</sup> OvaFla mice that received B6 CD45.1 bone marrow with those that received  
430 bone marrow from *Batf3*-deficient mice (Figure 5A). To our surprise, we found OT-I T cells  
431 were cross-primed in the bm1<sup>+</sup> WT OvaFla mice, even in the recipients that lacked cDC1s  
432 (Figure 5A-D). Interestingly, these data contrast with the bm1<sup>+</sup> *Nlrc4*<sup>-/-</sup> OvaFla mice, where the  
433 recipients given *Batf3*-deficient bone marrow had significantly fewer activated OT-I T cells than  
434 their counterparts given *Batf3*-sufficient bone marrow. OT-I T cell activation in the bm1<sup>+</sup>  
435 *Gsdmd*<sup>-/-</sup> OvaFla mice partially relied on *Batf3*<sup>+</sup> DCs. Furthermore, CellTrace Violet data show  
436 the OT-I T cells in the bm1<sup>+</sup> *Nlrc4*<sup>-/-</sup> and bm1<sup>+</sup> *Gsdmd*<sup>-/-</sup> OvaFla mice undergo fewer rounds of  
437 division in the absence of *Batf3* cDC1s (Figure 5D). These data suggest there may be two  
438 possible cross presentation pathways for IEC-derived antigen: one that occurs in the presence,  
439 and one in the absence, of inflammatory signals. Indeed, recent work shows that cDC2s can take  
440 on characteristics of cDC1s under inflammatory conditions (Bosteels et al., 2020) or in the  
441 absence of *Batf3* (Lukowski et al., 2021), though it remains uncertain if these cells are able to  
442 cross prime CD8<sup>+</sup> T cells or provide T cells with the appropriate homing signals. Perhaps IL-18  
443 and/or other inflammatory signals downstream of NAIP–NLRC4 activation can activate cDC1-  
444 like capabilities of cDC2s in our OvaFla system.

445 Our work raises several interesting questions for future study, including the mechanism  
446 of cDC maturation. The traditional model of DC maturation involves TLR signaling on the DC  
447 (Dalod, Chelbi, Malissen, & Lawrence, 2014). IL-1R (Pang, Ichinohe, & Iwasaki, 2013) or IL-  
448 18R (Li et al., 2004) on these cells might also trigger maturation, though further investigation is  
449 needed to understand how IL-1 $\beta$ , IL-18, or other inflammatory signals, such as eicosanoids  
450 (McDougal et al., 2021; Rauch et al., 2017), downstream of inflammasome activation might  
451 drive maturation of DCs that have acquired IEC-derived antigen.

452 Overall, our studies show that show that IEC-derived antigens are cross-presented both  
453 following NAIP–NLRC4 activation and under apparent homeostatic conditions (in the absence  
454 of NAIP–NLRC4 induced inflammation). In the context of NAIP–NLRC4 activation, cross-  
455 priming of CD8<sup>+</sup> T cells is partially dependent on gasdermin D-mediated pyroptosis and can  
456 occur in the absence of cDC1s. These data add insights to the complex interactions between  
457 innate and adaptive immune responses occurring in the intestine.

458  
459  
460

461 **Materials and Methods**

462

463 **Animals**

464 All mice were maintained under specific pathogen-free conditions and, unless otherwise  
465 indicated, fed a standard chow diet (Harlan irradiated laboratory animal diet) *ad libitum*. OvaFla  
466 mice were generated as previously described (Nichols et al., 2017) and crossed to Villin-Cre-  
467 ER<sup>T2</sup> (el Marjou et al., 2004) (Jax strain 020282). OvaFla Villin-Cre-ER<sup>T2</sup> mice were additionally  
468 bred to *Gsdmd*<sup>-/-</sup>, *Asc*<sup>-/-</sup> and *Nlrc4*<sup>-/-</sup> mice. *Nlrc4*<sup>-/-</sup> and *Asc*<sup>-/-</sup> mice were from V. Dixit  
469 (Mariathasan et al., 2004) (Genentech, South San Francisco, CA). *Gsdmd*<sup>-/-</sup> mice were  
470 previously described (Rauch et al., 2017). OT-I *Rag2*<sup>-/-</sup> mice (from E. Robey, Berkeley, CA)  
471 were used as a source of OT-Is for all adoptive transfer experiments.

472 For chimera experiments, the above OvaFla lines were crossed to B6.C-*H-2K<sup>bm1</sup>*/ByJ  
473 mice (Schulze et al., 1983) (Jax strain 001060). For the bone marrow donors, B6.CD45.1 (Jax  
474 strain 002014) and *Batf3*<sup>-/-</sup> (Jax strain 013755), mice were used.

475 Mice used for non-chimera experiments were 8-12 weeks old upon tissue harvest, and  
476 mice used as chimeras were 16-20 weeks old upon tissue harvest. Female mice were cohoused,  
477 and all experimental mice were age- and sex-matched when possible. OvaFla-only and Cre-only  
478 controls were littermates of the experimental mice. All animal experiments and endpoints were  
479 approved by and performed in accordance with the regulations of the University of California  
480 Berkeley Institutional Animal Care and Use Committee.

481

482 **Adoptive transfer of OT-I T cells**

483 The spleen and mesenteric lymph nodes were harvested from OT-I *Rag2*<sup>-/-</sup> mice, mashed  
484 between the frosted ends of two glass slides to create a single cell suspension, filtered through  
485 100mm nylon mesh, and pooled into a single tube. Red blood cells were lysed with ACK Lysing  
486 Buffer (Gibco; A10492-01). Cells were labeled with CellTrace Violet (ThermoFisher; C34557)  
487 following the manufacturers protocol and transferred i.v. to mice anesthetized with isoflurane at  
488  $2 \times 10^4$  cells per mouse.

489

490 **Tamoxifen administration**

491 The tamoxifen chow used in these studies was purchased from Envigo  
492 (<https://www.envigo.com/tamoxifen-custom-diets>; 120856). The diet contains 250 mg of  
493 tamoxifen per kilogram of chow and was irradiated prior to shipping. Mice were fed *ad libitum*  
494 for two days for the experiments in Figures 1B-1C and one day for the remaining experiments.  
495 Envigo assumes approximately 40 mg of tamoxifen is consumed per kilogram of body weight



496 per day for each mouse, though feed aversion leads to variable and limited initial food intake  
497 (Chiang et al., 2010).

498

#### 499 **Flow cytometry**

500 Spleens and mesenteric lymph nodes were harvested from euthanized mice and stored on ice in T  
501 cell media: RPMI 1640 (Gibco; 21870092) containing 10% FBS (Gibco, Cat#16140071,  
502 Lot#1447825), 1% penicillin-streptomycin, 1% L-glutamine, 1% sodium pyruvate, 0.5% 2-  
503 mercaptoethanol, and 25mM HEPES. For lymphocyte staining, tissues were mashed between the  
504 frosted ends of glass slides and filtered through 100mm nylon mesh. For myeloid staining,  
505 tissues were minced with scissors and forceps and incubated in T cell media containing 1 mg/mL  
506 collagenase VIII (Sigma; C2139-1G) at 37 °C for 45 minutes. The digested tissues were then  
507 passed through 70 mm filters and washed with T cell media. For all stains, red blood cells were  
508 lysed from a single cell suspension using ACK Lysing Buffer. Cells were counted using a  
509 Beckman Vi-CELL XR Cell Viability Analyzer (Beckman Coulter, Brea, CA), and  $3 \times 10^6$  cells  
510 per tissue per mouse were added to individual FACS tubes or wells of a 96-well non tissue  
511 culture treated round bottom plate.

512 For extracellular surface staining, cells were blocked for 20-30 minutes with a 1:1000  
513 dilution of anti-mouse CD16 and CD32 antibodies (eBioscience; 14-0161-85) at 4 °C and then  
514 stained with a cocktail of antibodies for extracellular markers (Supplemental Table 1) at RT for 1  
515 hour. All dilutions and washes were done with 1X PBS (Gibco; 10010049) containing 5%  
516 FBS/FCS.

517 For intracellular cytokine analysis, cells were incubated at  $1 \times 10^6$  cells/mL T cell media  
518 plus 1µg/mL phorbol myristate acetate (PMA) (Invivogen; tlr1-pma), 1µg/mL ionomycin  
519 (Calbiochem; 407952-1MG), and 1µg/mL GolgiPlug™ (BD Biosciences; 555029) at 37°C for 5  
520 hours. Cells were then washed and blocked for 20-30 minutes with a 1:1000 dilution of anti-  
521 mouse CD16 and CD32 antibodies at 4 °C, and a surface stain was applied for 1 hour at RT  
522 (Supplemental Table 1). Cells were then fixed in 100mL eBioscience™ IC Fixation Buffer  
523 (Thermo; 00-8222-49) for 20-60 minutes RT, and then stained with an intracellular staining  
524 cocktail (Supplemental Table 1) in 1X eBioscience™ Permeabilization Buffer (Thermo; 00-  
525 8333-56) at RT for 1 hour. Cells were washed and resuspended in PBS prior to analysis. The  
526 data were collected on a BD Biosciences Fortessa (San Jose, CA) in the UC Berkeley Cancer  
527 Research Laboratory Flow Cytometry facility, and analysis was performed using FlowJo 10  
528 Software (BD Biosciences, San Jose, CA).

529

530

531

532 **Generation of bone marrow chimeras**

533 Eight- to twelve-week-old mice were lethally irradiated with a Precision X-Rad320 X-ray  
534 irradiator (North Branford, CT) using a split dose of 500 rads and then 450 rads, approximately  
535 15 hours apart. Bone marrow was harvested from the long bones of the indicated donor strains,  
536 red blood cells were lysed using ACK Lysing Buffer, and CD3<sup>+</sup> cells were depleted from the  
537 donor cells using a biotinylated anti-mouse CD3e mAb (BioLegend; 100304) and the Miltenyi  
538 MACS® MicroBead (Miltenyi; 130-105-637) magnetic depletion protocol with LD columns  
539 (Miltenyi; 130-042-901) to reduce graft vs host reactions (Selvaggi, Ricordi, Podack, &  
540 Inverardi, 1996). Recipient mice were anesthetized with isoflurane, and approximately 5×10<sup>6</sup>  
541 donor cells were injected retro-orbitally. Females from the different strains were co-housed, and  
542 at least eight weeks passed between reconstitution and the start of any experiment.

543

544 **Immunofluorescence**

545 Mice were fed a single day pulse of tamoxifen chow and euthanized two days from start of the  
546 chow feeding. Approximately 2.5 cm pieces were taken from the proximal and distal ends of the  
547 small intestine. These pieces were flushed and fixed in PLP buffer (0.05 M phosphate buffer  
548 containing 0.1 M L-lysine [pH 7.4], 2 mg/mL NaIO<sub>4</sub>, and 1% PFA) overnight at 4 °C. The  
549 following day, tissues were washed 2x in phosphate buffer and placed in 30% sucrose overnight  
550 at 4 °C. Tissue was frozen in Tissue-Tek® OCT (VWR; 25608-930), cut on a Leica cryostat, and  
551 sections were placed on Fisherbrand™ Tissue Path Superfrost™ Plus Gold Slides (Fisher  
552 Scientific; 15-188-48).

553 For staining, slides were allowed to warm to room temperature, traced with an ImmEdge  
554 Hydrophobic Barrier Pen (Vector Labs; H-4000), washed 3× in 1× PBS with 0.5% Tween-20,  
555 and blocked with 10% normal donkey serum (Sigma; D9663) in 0.5% Tween-20, 100 mM  
556 TrisHCl [pH 7.5], 150 mM NaCl, 0.5% blocking reagent (Perkin Elmer; FP1020) for 30 minutes.  
557 Tissues were then stained with 1:300 GFP polyclonal antibody (Invitrogen; A-6455) overnight at  
558 4 °C. Slides were washed 3X and stained with donkey anti-rabbit Alexa Fluor 488 (Jackson  
559 Immunoresearch; 711-545-152) for 60 minutes at RT, followed by 150 nM Acti-stain™ 555  
560 phalloidin (Cytoskeleton, Inc; PHDH1-A) and 100 mM DAPI (D1306) for 30 minutes at RT.  
561 Slides were then washed 2X in H<sub>2</sub>O and sealed under glass coverslips prior to imaging. All  
562 antibody dilutions were done in 100 mM TrisHCl [pH 7.5], 150 mM NaCl, 0.5% blocking  
563 reagent; all washes were done in 1X PBS with 0.5% Tween-20.

564 Slides were imaged on a Zeiss LSM710 at the CNR Biological Imaging Facility at the  
565 University of California, Berkeley. Images were blinded and manually quantified for GFP<sup>+</sup> IECs.  
566 For quantification, DAPI<sup>+</sup> IECs were counted in at least 15 villi per mouse—DAPI<sup>+</sup> cells were  
567 counted prior to revealing the GFP<sup>+</sup> cells in the 488 channel. ImageJ (National Institutes of

568 Health) was used to visualize images and globally adjust contrast and brightness for print quality  
569 following quantification.

570

### 571 **Serum IL-18 measurement**

572 Thermo Scientific Immuno MaxiSorp ELISA plates (Thermo Fisher; 439454) were coated with  
573 1µg/mL anti-mouse IL-18 mAb (MBL; D048-6) overnight at 4°C, and blocked with 1× PBS  
574 containing 1% BSA for 2-4 hours at RT. Serum was diluted 1:5 in PBS with 1% BSA, added to  
575 the plate with a purified IL-18 standard, and incubated overnight at 4°C. A biotinylated anti-  
576 mouse IL-18 sandwich mAb (BioXcell; BE0237) was added at 1:2000 in PBS with 1% BSA and  
577 incubated for 1-2 hours at RT. BD Pharmingen™ Streptavidin HRP (BD Biosciences; 554066)  
578 was added at 1:1000 in PBS with 1% BSA. Following a final 5× wash, plates were developed  
579 with 1 mg/mL OPD (Sigma; P3804-100TAB) in citrate buffer (PBS with 0.05 M NaH<sub>2</sub>PO<sub>4</sub> and  
580 0.02 M Citric acid) plus 9.8M H<sub>2</sub>O<sub>2</sub>. The reaction was stopped with a 3 M HCl acid stop after  
581 approximately 10 minutes. Absorbance at 490 nm was measured on a Tecan Spark® multimode  
582 microplate reader (Tecan Trading AG, Switzerland).

583

### 584 **Statistical analysis**

585 For all bar graphs, data are shown as mean ± SD. For Figures 1-4, the significance between each  
586 genotype was calculated using one-way ANOVA and Tukey's multiple comparisons test. For  
587 Figure 5, the significance between mice that received B6 CD45.1 and mice that received *Batf3*<sup>-/-</sup>  
588 bone marrow was calculated using one-way ANOVA and Šídák's multiple comparisons test. For  
589 all data, \**p* < 0.05, \*\**p* < 0.01, \*\*\**p* < 0.001. Tests were run using GraphPad Prism (San Diego,  
590 CA).

591

### 592 **Acknowledgements**

593 We thank members of the Vance and Barton Labs for discussions, Greg Barton and Ellen Robey  
594 for comments on the manuscript, Dmitri Kotov for comments on the manuscript and advice, and  
595 Roberto Chavez for technical assistance. We also thank the UC Berkeley Cancer Research  
596 Laboratory Flow Cytometry facility, including Hector Nolla and Alma Valeros. Figure 4A was  
597 created with BioRender.com. Research reported in this publication was supported in part by the  
598 National Institutes of Health S10 program under award number 1S10RR026866-01. The content  
599 is solely the responsibility of the authors and does not necessarily represent the official views of  
600 the National Institutes of Health. R.E.V. is an Investigator of the Howard Hughes Medical  
601 Institute, and research in his laboratory is funded by NIH grants AI075039, AI063302, and  
602 AI155634.

603

604 **Conflicts of Interest**

605 R.E.V. consults for Ventus Therapeutics and Tempest Therapeutics.

606  
607  
608  
609  
610  
611  
612  
613  
614  
615  
616  
617  
618  
619  
620  
621  
622  
623  
624  
625  
626  
627  
628  
629  
630  
631  
632  
633  
634  
635  
636  
637  
638  
639  
640  
641  
642  
643  
644  
645  
646  
647  
648  
649  
650  
651

## References

- Bosteels, C., Neyt, K., Vanheerswynghels, M., van Helden, M. J., Sichien, D., Debeuf, N., . . . Lambrecht, B. N. (2020). Inflammatory Type 2 cDCs Acquire Features of cDC1s and Macrophages to Orchestrate Immunity to Respiratory Virus Infection. *Immunity*, *52*(6), 1039-1056 e1039. doi:10.1016/j.immuni.2020.04.005
- Broz, P., & Dixit, V. M. (2016). Inflammasomes: mechanism of assembly, regulation and signalling. *Nat Rev Immunol*, *16*(7), 407-420. doi:10.1038/nri.2016.58
- Broz, P., Newton, K., Lamkanfi, M., Mariathasan, S., Dixit, V. M., & Monack, D. M. (2010). Redundant roles for inflammasome receptors NLRP3 and NLRC4 in host defense against Salmonella. *J Exp Med*, *207*(8), 1745-1755. doi:10.1084/jem.20100257
- Broz, P., von Moltke, J., Jones, J. W., Vance, R. E., & Monack, D. M. (2010). Differential requirement for Caspase-1 autoproteolysis in pathogen-induced cell death and cytokine processing. *Cell Host Microbe*, *8*(6), 471-483. doi:10.1016/j.chom.2010.11.007
- Bullen, T. F., Forrest, S., Campbell, F., Dodson, A. R., Hershman, M. J., Pritchard, D. M., . . . Watson, A. J. (2006). Characterization of epithelial cell shedding from human small intestine. *Lab Invest*, *86*(10), 1052-1063. doi:10.1038/labinvest.3700464
- Cerovic, V., Houston, S. A., Westlund, J., Utriainen, L., Davison, E. S., Scott, C. L., . . . Milling, S. W. (2015). Lymph-borne CD8alpha+ dendritic cells are uniquely able to cross-prime CD8+ T cells with antigen acquired from intestinal epithelial cells. *Mucosal Immunol*, *8*(1), 38-48. doi:10.1038/mi.2014.40
- Chiang, P. M., Ling, J., Jeong, Y. H., Price, D. L., Aja, S. M., & Wong, P. C. (2010). Deletion of TDP-43 down-regulates Tbc1d1, a gene linked to obesity, and alters body fat metabolism. *Proc Natl Acad Sci U S A*, *107*(37), 16320-16324. doi:10.1073/pnas.1002176107
- Christ, A. D., & Blumberg, R. S. (1997). The intestinal epithelial cell: immunological aspects. *Springer Semin Immunopathol*, *18*(4), 449-461. doi:10.1007/BF00824052
- Cummings, R. J., Barbet, G., Bongers, G., Hartmann, B. M., Gettler, K., Muniz, L., . . . Blander, J. M. (2016). Different tissue phagocytes sample apoptotic cells to direct distinct homeostasis programs. *Nature*, *539*(7630), 565-569. doi:10.1038/nature20138
- Dalod, M., Chelbi, R., Malissen, B., & Lawrence, T. (2014). Dendritic cell maturation: functional specialization through signaling specificity and transcriptional programming. *EMBO J*, *33*(10), 1104-1116. doi:10.1002/embj.201488027
- Dance, A. (2019). Core Concept: Cells nibble one another via the under-appreciated process of trogocytosis. *Proc Natl Acad Sci U S A*, *116*(36), 17608-17610. doi:10.1073/pnas.1912252116
- de Vasconcelos, N. M., Van Opdenbosch, N., Van Gorp, H., Parthoens, E., & Lamkanfi, M. (2019). Single-cell analysis of pyroptosis dynamics reveals conserved GSDMD-mediated subcellular events that precede plasma membrane rupture. *Cell Death Differ*, *26*(1), 146-161. doi:10.1038/s41418-018-0106-7
- Deets, K. A., & Vance, R. E. (2021). Inflammasomes and adaptive immune responses. *Nat Immunol*, *22*(4), 412-422. doi:10.1038/s41590-021-00869-6
- DiPeso, L., Ji, D. X., Vance, R. E., & Price, J. V. (2017). Cell death and cell lysis are separable events during pyroptosis. *Cell Death Discov*, *3*, 17070. doi:10.1038/cddiscovery.2017.70
- Edelson, B. T., Kc, W., Juang, R., Kohyama, M., Benoit, L. A., Klekotka, P. A., . . . Murphy, K. M. (2010). Peripheral CD103+ dendritic cells form a unified subset developmentally

- 652 related to CD8alpha+ conventional dendritic cells. *J Exp Med*, 207(4), 823-836.  
653 doi:10.1084/jem.20091627
- 654 el Marjou, F., Janssen, K. P., Chang, B. H., Li, M., Hindie, V., Chan, L., . . . Robine, S. (2004).  
655 Tissue-specific and inducible Cre-mediated recombination in the gut epithelium. *Genesis*,  
656 39(3), 186-193. doi:10.1002/gene.20042
- 657 Esterhazy, D., Canesso, M. C. C., Mesin, L., Muller, P. A., de Castro, T. B. R., Lockhart, A., . . .  
658 Mucida, D. (2019). Compartmentalized gut lymph node drainage dictates adaptive  
659 immune responses. *Nature*, 569(7754), 126-130. doi:10.1038/s41586-019-1125-3
- 660 Evavold, C. L., & Kagan, J. C. (2018). How Inflammasomes Inform Adaptive Immunity. *J Mol*  
661 *Biol*, 430(2), 217-237. doi:10.1016/j.jmb.2017.09.019
- 662 Evavold, C. L., Ruan, J., Tan, Y., Xia, S., Wu, H., & Kagan, J. C. (2018). The Pore-Forming  
663 Protein Gasdermin D Regulates Interleukin-1 Secretion from Living Macrophages.  
664 *Immunity*, 48(1), 35-44 e36. doi:10.1016/j.immuni.2017.11.013
- 665 Farache, J., Koren, I., Milo, I., Gurevich, I., Kim, K. W., Zigmond, E., . . . Shakhar, G. (2013).  
666 Luminal bacteria recruit CD103+ dendritic cells into the intestinal epithelium to sample  
667 bacterial antigens for presentation. *Immunity*, 38(3), 581-595.  
668 doi:10.1016/j.immuni.2013.01.009
- 669 Fattinger, S. A., Geiser, P., Samperio Ventayol, P., Di Martino, M. L., Furter, M., Felmy, B., . . .  
670 Sellin, M. E. (2021). Epithelium-autonomous NAIP/NLRC4 prevents TNF-driven  
671 inflammatory destruction of the gut epithelial barrier in Salmonella-infected mice.  
672 *Mucosal Immunol*, 14(3), 615-629. doi:10.1038/s41385-021-00381-y
- 673 Hall, P. A., Coates, P. J., Ansari, B., & Hopwood, D. (1994). Regulation of cell number in the  
674 mammalian gastrointestinal tract: the importance of apoptosis. *J Cell Sci*, 107 (Pt 12),  
675 3569-3577. Retrieved from <https://www.ncbi.nlm.nih.gov/pubmed/7706406>
- 676 Hausmann, A., Bock, D., Geiser, P., Berthold, D. L., Fattinger, S. A., Furter, M., . . . Hardt, W.  
677 D. (2020). Intestinal epithelial NAIP/NLRC4 restricts systemic dissemination of the  
678 adapted pathogen Salmonella Typhimurium due to site-specific bacterial PAMP  
679 expression. *Mucosal Immunol*, 13(3), 530-544. doi:10.1038/s41385-019-0247-0
- 680 He, W. T., Wan, H., Hu, L., Chen, P., Wang, X., Huang, Z., . . . Han, J. (2015). Gasdermin D is  
681 an executor of pyroptosis and required for interleukin-1beta secretion. *Cell Res*, 25(12),  
682 1285-1298. doi:10.1038/cr.2015.139
- 683 Heilig, R., Dick, M. S., Sborgi, L., Meunier, E., Hiller, S., & Broz, P. (2018). The Gasdermin-D  
684 pore acts as a conduit for IL-1beta secretion in mice. *Eur J Immunol*, 48(4), 584-592.  
685 doi:10.1002/eji.201747404
- 686 Hogquist, K. A., Jameson, S. C., Heath, W. R., Howard, J. L., Bevan, M. J., & Carbone, F. R.  
687 (1994). T cell receptor antagonist peptides induce positive selection. *Cell*, 76(1), 17-27.  
688 doi:10.1016/0092-8674(94)90169-4
- 689 Huang, F. P., Platt, N., Wykes, M., Major, J. R., Powell, T. J., Jenkins, C. D., & MacPherson, G.  
690 G. (2000). A discrete subpopulation of dendritic cells transports apoptotic intestinal  
691 epithelial cells to T cell areas of mesenteric lymph nodes. *J Exp Med*, 191(3), 435-444.  
692 doi:10.1084/jem.191.3.435
- 693 Ichinohe, T., Lee, H. K., Ogura, Y., Flavell, R., & Iwasaki, A. (2009). Inflammasome  
694 recognition of influenza virus is essential for adaptive immune responses. *J Exp Med*,  
695 206(1), 79-87. doi:10.1084/jem.20081667
- 696 Iwasaki, A., & Medzhitov, R. (2015). Control of adaptive immunity by the innate immune  
697 system. *Nat Immunol*, 16(4), 343-353. doi:10.1038/ni.3123



- 698 Janeway, C. A., Jr. (1989). Approaching the asymptote? Evolution and revolution in  
699 immunology. *Cold Spring Harb Symp Quant Biol*, 54 Pt 1, 1-13.  
700 doi:10.1101/sqb.1989.054.01.003
- 701 Kayagaki, N., Stowe, I. B., Lee, B. L., O'Rourke, K., Anderson, K., Warming, S., . . . Dixit, V.  
702 M. (2015). Caspase-11 cleaves gasdermin D for non-canonical inflammasome signalling.  
703 *Nature*, 526(7575), 666-671. doi:10.1038/nature15541
- 704 Kofoed, E. M., & Vance, R. E. (2011). Innate immune recognition of bacterial ligands by NAIPs  
705 determines inflammasome specificity. *Nature*, 477(7366), 592-595.  
706 doi:10.1038/nature10394
- 707 Kupz, A., Guarda, G., Gebhardt, T., Sander, L. E., Short, K. R., Diavatopoulos, D. A., . . .  
708 Bedoui, S. (2012). NLRC4 inflammasomes in dendritic cells regulate noncognate effector  
709 function by memory CD8(+) T cells. *Nat Immunol*, 13(2), 162-169. doi:10.1038/ni.2195
- 710 Kurts, C., Heath, W. R., Carbone, F. R., Allison, J., Miller, J. F., & Kosaka, H. (1996).  
711 Constitutive class I-restricted exogenous presentation of self antigens in vivo. *J Exp Med*,  
712 184(3), 923-930. doi:10.1084/jem.184.3.923
- 713 Kurts, C., Kosaka, H., Carbone, F. R., Miller, J. F., & Heath, W. R. (1997). Class I-restricted  
714 cross-presentation of exogenous self-antigens leads to deletion of autoreactive CD8(+) T  
715 cells. *J Exp Med*, 186(2), 239-245. doi:10.1084/jem.186.2.239
- 716 Li, J., Mbow, M. L., Sun, L., Li, L., Yang, G., Griswold, D. E., . . . Peritt, D. (2004). Induction of  
717 dendritic cell maturation by IL-18. *Cell Immunol*, 227(2), 103-108.  
718 doi:10.1016/j.cellimm.2004.02.002
- 719 Liu, W., Evanoff, D. P., Chen, X., & Luo, Y. (2007). Urinary bladder epithelium antigen induces  
720 CD8+ T cell tolerance, activation, and autoimmune response. *J Immunol*, 178(1), 539-  
721 546. doi:10.4049/jimmunol.178.1.539
- 722 Liu, Z., & Lefrancois, L. (2004). Intestinal epithelial antigen induces mucosal CD8 T cell  
723 tolerance, activation, and inflammatory response. *J Immunol*, 173(7), 4324-4330.  
724 doi:10.4049/jimmunol.173.7.4324
- 725 Lukowski, S. W., Rodahl, I., Kelly, S., Yu, M., Gotley, J., Zhou, C., . . . Chandra, J. (2021).  
726 Absence of Batf3 reveals a new dimension of cell state heterogeneity within conventional  
727 dendritic cells. *iScience*, 24(5), 102402. doi:10.1016/j.isci.2021.102402
- 728 Man, S. M., Toulomousis, P., Hopkins, L., Monie, T. P., Fitzgerald, K. A., & Bryant, C. E.  
729 (2013). Salmonella infection induces recruitment of Caspase-8 to the inflammasome to  
730 modulate IL-1beta production. *J Immunol*, 191(10), 5239-5246.  
731 doi:10.4049/jimmunol.1301581
- 732 Mariathasan, S., Newton, K., Monack, D. M., Vucic, D., French, D. M., Lee, W. P., . . . Dixit, V.  
733 M. (2004). Differential activation of the inflammasome by caspase-1 adaptors ASC and  
734 Ipaf. *Nature*, 430(6996), 213-218. doi:10.1038/nature02664
- 735 Marshman, E., Ottewill, P. D., Potten, C. S., & Watson, A. J. (2001). Caspase activation during  
736 spontaneous and radiation-induced apoptosis in the murine intestine. *J Pathol*, 195(3),  
737 285-292. doi:10.1002/path.967
- 738 McDaniel, M. M., Kottyan, L. C., Singh, H., & Pasare, C. (2020). Suppression of Inflammasome  
739 Activation by IRF8 and IRF4 in cDCs Is Critical for T Cell Priming. *Cell Rep*, 31(5),  
740 107604. doi:10.1016/j.celrep.2020.107604
- 741 McDougal, C. E., Morrow, Z. T., Kim, S., Carter, D., Stevenson, D. M., Amador-Noguez, D., . . .  
742 . Sauer, J.-D. (2021). Prostaglandin E<sub>2</sub> induction by cytosolic *Listeria*

- 743 monocyto**genes** in phagocytes is necessary for optimal T-cell priming. *bioRxiv*,  
744 2021.2003.2023.436585. doi:10.1101/2021.03.23.436585
- 745 Mitchell, P. S., Roncaioli, J. L., Turcotte, E. A., Goers, L., Chavez, R. A., Lee, A. Y., . . . Vance,  
746 R. E. (2020). NAIP-NLRC4-deficient mice are susceptible to shigellosis. *Elife*, *9*.  
747 doi:10.7554/eLife.59022
- 748 Nakazawa, A., Dotan, I., Brimnes, J., Allez, M., Shao, L., Tsushima, F., . . . Mayer, L. (2004).  
749 The expression and function of costimulatory molecules B7H and B7-H1 on colonic  
750 epithelial cells. *Gastroenterology*, *126*(5), 1347-1357. doi:10.1053/j.gastro.2004.02.004
- 751 Nichols, R. D. (2017). *Systemic Effects downstream of NAIP/NLRC4 Inflammasome Activation*  
752 *in vivo*. (Doctor of Philosophy Dissertation). UC Berkeley, Retrieved from  
753 <https://escholarship.org/uc/item/1081t0ht> Available from ProQuest
- 754 Nichols, R. D., von Moltke, J., & Vance, R. E. (2017). NAIP/NLRC4 inflammasome activation  
755 in MRP8(+) cells is sufficient to cause systemic inflammatory disease. *Nat Commun*,  
756 *8*(1), 2209. doi:10.1038/s41467-017-02266-w
- 757 Nikolic-Zugic, J., & Bevan, M. J. (1990). Role of self-peptides in positively selecting the T-cell  
758 repertoire. *Nature*, *344*(6261), 65-67. doi:10.1038/344065a0
- 759 Nordlander, S., Pott, J., & Maloy, K. J. (2014). NLRC4 expression in intestinal epithelial cells  
760 mediates protection against an enteric pathogen. *Mucosal Immunol*, *7*(4), 775-785.  
761 doi:10.1038/mi.2013.95
- 762 O'Donnell, H., Pham, O. H., Li, L. X., Atif, S. M., Lee, S. J., Ravesloot, M. M., . . . McSorley, S.  
763 J. (2014). Toll-like receptor and inflammasome signals converge to amplify the innate  
764 bactericidal capacity of T helper 1 cells. *Immunity*, *40*(2), 213-224.  
765 doi:10.1016/j.immuni.2013.12.013
- 766 Pang, I. K., Ichinohe, T., & Iwasaki, A. (2013). IL-1R signaling in dendritic cells replaces  
767 pattern-recognition receptors in promoting CD8(+) T cell responses to influenza A virus.  
768 *Nat Immunol*, *14*(3), 246-253. doi:10.1038/ni.2514
- 769 Pham, O. H., O'Donnell, H., Al-Shamkhani, A., Kerrinnes, T., Tsohis, R. M., & McSorley, S. J.  
770 (2017). T cell expression of IL-18R and DR3 is essential for non-cognate stimulation of  
771 Th1 cells and optimal clearance of intracellular bacteria. *PLoS Pathog*, *13*(8), e1006566.  
772 doi:10.1371/journal.ppat.1006566
- 773 Rathinam, V. A., & Fitzgerald, K. A. (2016). Inflammasome Complexes: Emerging Mechanisms  
774 and Effector Functions. *Cell*, *165*(4), 792-800. doi:10.1016/j.cell.2016.03.046
- 775 Rauch, I., Deets, K. A., Ji, D. X., von Moltke, J., Tenthorey, J. L., Lee, A. Y., . . . Vance, R. E.  
776 (2017). NAIP-NLRC4 Inflammasomes Coordinate Intestinal Epithelial Cell Expulsion  
777 with Eicosanoid and IL-18 Release via Activation of Caspase-1 and -8. *Immunity*, *46*(4),  
778 649-659. doi:10.1016/j.immuni.2017.03.016
- 779 Rauch, I., Tenthorey, J. L., Nichols, R. D., Al Moussawi, K., Kang, J. J., Kang, C., . . . Vance, R.  
780 E. (2016). NAIP proteins are required for cytosolic detection of specific bacterial ligands  
781 *in vivo*. *J Exp Med*, *213*(5), 657-665. doi:10.1084/jem.20151809
- 782 Sauer, J. D., Pereyre, S., Archer, K. A., Burke, T. P., Hanson, B., Lauer, P., & Portnoy, D. A.  
783 (2011). *Listeria monocytogenes* engineered to activate the Nlrc4 inflammasome are  
784 severely attenuated and are poor inducers of protective immunity. *Proc Natl Acad Sci U S*  
785 *A*, *108*(30), 12419-12424. doi:10.1073/pnas.1019041108
- 786 Schulze, D. H., Pease, L. R., Geier, S. S., Reyes, A. A., Sarmiento, L. A., Wallace, R. B., &  
787 Nathenson, S. G. (1983). Comparison of the cloned H-2Kbm1 variant gene with the H-



- 788 2Kb gene shows a cluster of seven nucleotide differences. *Proc Natl Acad Sci U S A*,  
789 80(7), 2007-2011. doi:10.1073/pnas.80.7.2007
- 790 Sellin, M. E., Muller, A. A., Felmy, B., Dolowschiak, T., Diard, M., Tardivel, A., . . . Hardt, W.  
791 D. (2014). Epithelium-intrinsic NAIP/NLRC4 inflammasome drives infected enterocyte  
792 expulsion to restrict Salmonella replication in the intestinal mucosa. *Cell Host Microbe*,  
793 16(2), 237-248. doi:10.1016/j.chom.2014.07.001
- 794 Selvaggi, G., Ricordi, C., Podack, E. R., & Inverardi, L. (1996). The role of the perforin and Fas  
795 pathways of cytotoxicity in skin graft rejection. *Transplantation*, 62(12), 1912-1915.  
796 doi:10.1097/00007890-199612270-00040
- 797 Shi, J., Zhao, Y., Wang, K., Shi, X., Wang, Y., Huang, H., . . . Shao, F. (2015). Cleavage of  
798 GSDMD by inflammatory caspases determines pyroptotic cell death. *Nature*, 526(7575),  
799 660-665. doi:10.1038/nature15514
- 800 Shibahara, T., Sato, N., Waguri, S., Iwanaga, T., Nakahara, A., Fukutomi, H., & Uchiyama, Y.  
801 (1995). The fate of effete epithelial cells at the villus tips of the human small intestine.  
802 *Arch Histol Cytol*, 58(2), 205-219. doi:10.1679/aohc.58.205
- 803 Svensson, M., Marsal, J., Ericsson, A., Carramolino, L., Broden, T., Marquez, G., & Agace, W.  
804 W. (2002). CCL25 mediates the localization of recently activated CD8alpha(+) lymphocytes  
805 to the small-intestinal mucosa. *J Clin Invest*, 110(8), 1113-1121.  
806 doi:10.1172/JCI15988
- 807 Theisen, E., & Sauer, J. D. (2017). *Listeria monocytogenes*-Induced Cell Death Inhibits the  
808 Generation of Cell-Mediated Immunity. *Infect Immun*, 85(1), e00733-00716.  
809 doi:10.1128/IAI.00733-16
- 810 Tourlomousis, P., Wright, J. A., Bittante, A. S., Hopkins, L. J., Webster, S. J., Bryant, O. J., . . .  
811 Bryant, C. E. (2020). Modifying bacterial flagellin to evade Nod-like Receptor CARD 4  
812 recognition enhances protective immunity against Salmonella. *Nat Microbiol*, 5(12),  
813 1588-1597. doi:10.1038/s41564-020-00801-y
- 814 Trunk, G., & Oxenius, A. (2012). Innate instruction of CD4+ T cell immunity in respiratory  
815 bacterial infection. *J Immunol*, 189(2), 616-628. doi:10.4049/jimmunol.1200924
- 816 Vezys, V., Olson, S., & Lefrancois, L. (2000). Expression of intestine-specific antigen reveals  
817 novel pathways of CD8 T cell tolerance induction. *Immunity*, 12(5), 505-514.  
818 doi:10.1016/s1074-7613(00)80202-2
- 819 von Moltke, J., Trinidad, N. J., Moayeri, M., Kintzer, A. F., Wang, S. B., van Rooijen, N., . . .  
820 Vance, R. E. (2012). Rapid induction of inflammatory lipid mediators by the  
821 inflammasome in vivo. *Nature*, 490(7418), 107-111. doi:10.1038/nature11351
- 822 Watson, A. J., Chu, S., Sieck, L., Gerasimenko, O., Bullen, T., Campbell, F., . . . Montrose, M.  
823 H. (2005). Epithelial barrier function in vivo is sustained despite gaps in epithelial layers.  
824 *Gastroenterology*, 129(3), 902-912. doi:10.1053/j.gastro.2005.06.015
- 825 Zhao, Y., Shi, J., Shi, X., Wang, Y., Wang, F., & Shao, F. (2016). Genetic functions of the NAIP  
826 family of inflammasome receptors for bacterial ligands in mice. *J Exp Med*, 213(5), 647-  
827 656. doi:10.1084/jem.20160006
- 828 Zhao, Y., Yang, J., Shi, J., Gong, Y. N., Lu, Q., Xu, H., . . . Shao, F. (2011). The NLRC4  
829 inflammasome receptors for bacterial flagellin and type III secretion apparatus. *Nature*,  
830 477(7366), 596-600. doi:10.1038/nature10510
- 831
- 832

833 **Supplementary table 1.** List of antibodies used for flow cytometry.

| <b>Antibody</b>                            | <b>Company</b> | <b>Cat no.</b> | <b>Clone</b> | <b>Dilution</b> |
|--------------------------------------------|----------------|----------------|--------------|-----------------|
| <b>Lymphocyte Stain</b>                    |                |                |              |                 |
| CD45.1 monoclonal, APC                     | eBioscience    | 17-0453-81     | A20          | 1:300           |
| PE/Cy7 anti-mouse CD45.2                   | BioLegend      | 109830         | 104          | 1:300           |
| Brilliant Violet 650™ anti-mouse CD8a      | BioLegend      | 100742         | 53-6.7       | 1:300           |
| BB515 Rat Anti-Mouse CD44                  | BD             | 564587         | IM9          | 1:300           |
| Brilliant Violet 711™ anti-mouse CD62L     | BioLegend      | 104445         | MEL-14       | 1:300           |
| PE anti-mouse CD199 (CCR9)                 | BioLegend      | 129707         | 9B1          | 1:100           |
| MHC Class II (I-A/I-E), APC-eFluor 780     | BioLegend      | 107628         | M5/114.15.2  | 1:300           |
| APC/Fire™ 750 anti-mouse CD4               | BioLegend      | 100460         | GK1.5        | 1:300           |
| TNF alpha Monoclonal, FITC                 | eBioscience    | 11-7321-82     | MP6-XT22     | 1:100           |
| IFN gamma Monoclonal, PE-Cyanine7          | eBioscience    | 25-7311-82     | XMG1.2       | 1:100           |
|                                            |                |                |              |                 |
| <b>Myeloid Stain</b>                       |                |                |              |                 |
| Anti-Mouse CD11b PE-Cyanine7               | eBioscience    | 25-0112-81     | M1/70        | 1:300           |
| Brilliant Violet 711 CD11c                 | Biolegend      | 117349         | N418         | 1:300           |
| Brilliant Violet 785™ anti-mouse CD45      | Biolegend      | 103149         | 30-F11       | 1:300           |
| FITC anti-mouse MHC II I-A/I-E             | Biolegend      | 107605         | M5/114.15.2  | 1:400           |
| CD103 (Integrin alpha E) PE                | eBioscience    | 12-1031-82     | 2E7          | 1:200           |
| APC anti-mouse/rat XCR1                    | Biolegend      | 148206         | ZET          | 1:300           |
| APC/Fire™ 750 anti-mouse CD90.2 (Thy-1.2)  | Biolegend      | 140326         | 53-2.1       | 1:300           |
| APC/Cyanine7 anti-mouse Ly-6G/Ly-6C (Gr-1) | Biolegend      | 108424         | Gr1          | 1:300           |
| APC anti-mouse CD64 (FcγRI)                | Biolegend      | 139306         | X54-5/7.1    | 1:100           |
|                                            |                |                |              |                 |
| <b>Other</b>                               |                |                |              |                 |
| Anti-Mouse CD16/CD32 Purified              | eBioscience    | 14-0161-85     | 93           | 1:1000          |
| Ghost Dye Red 780                          | Tonbo          | 13-0865-T500   | n/a          | 1:1000          |

834

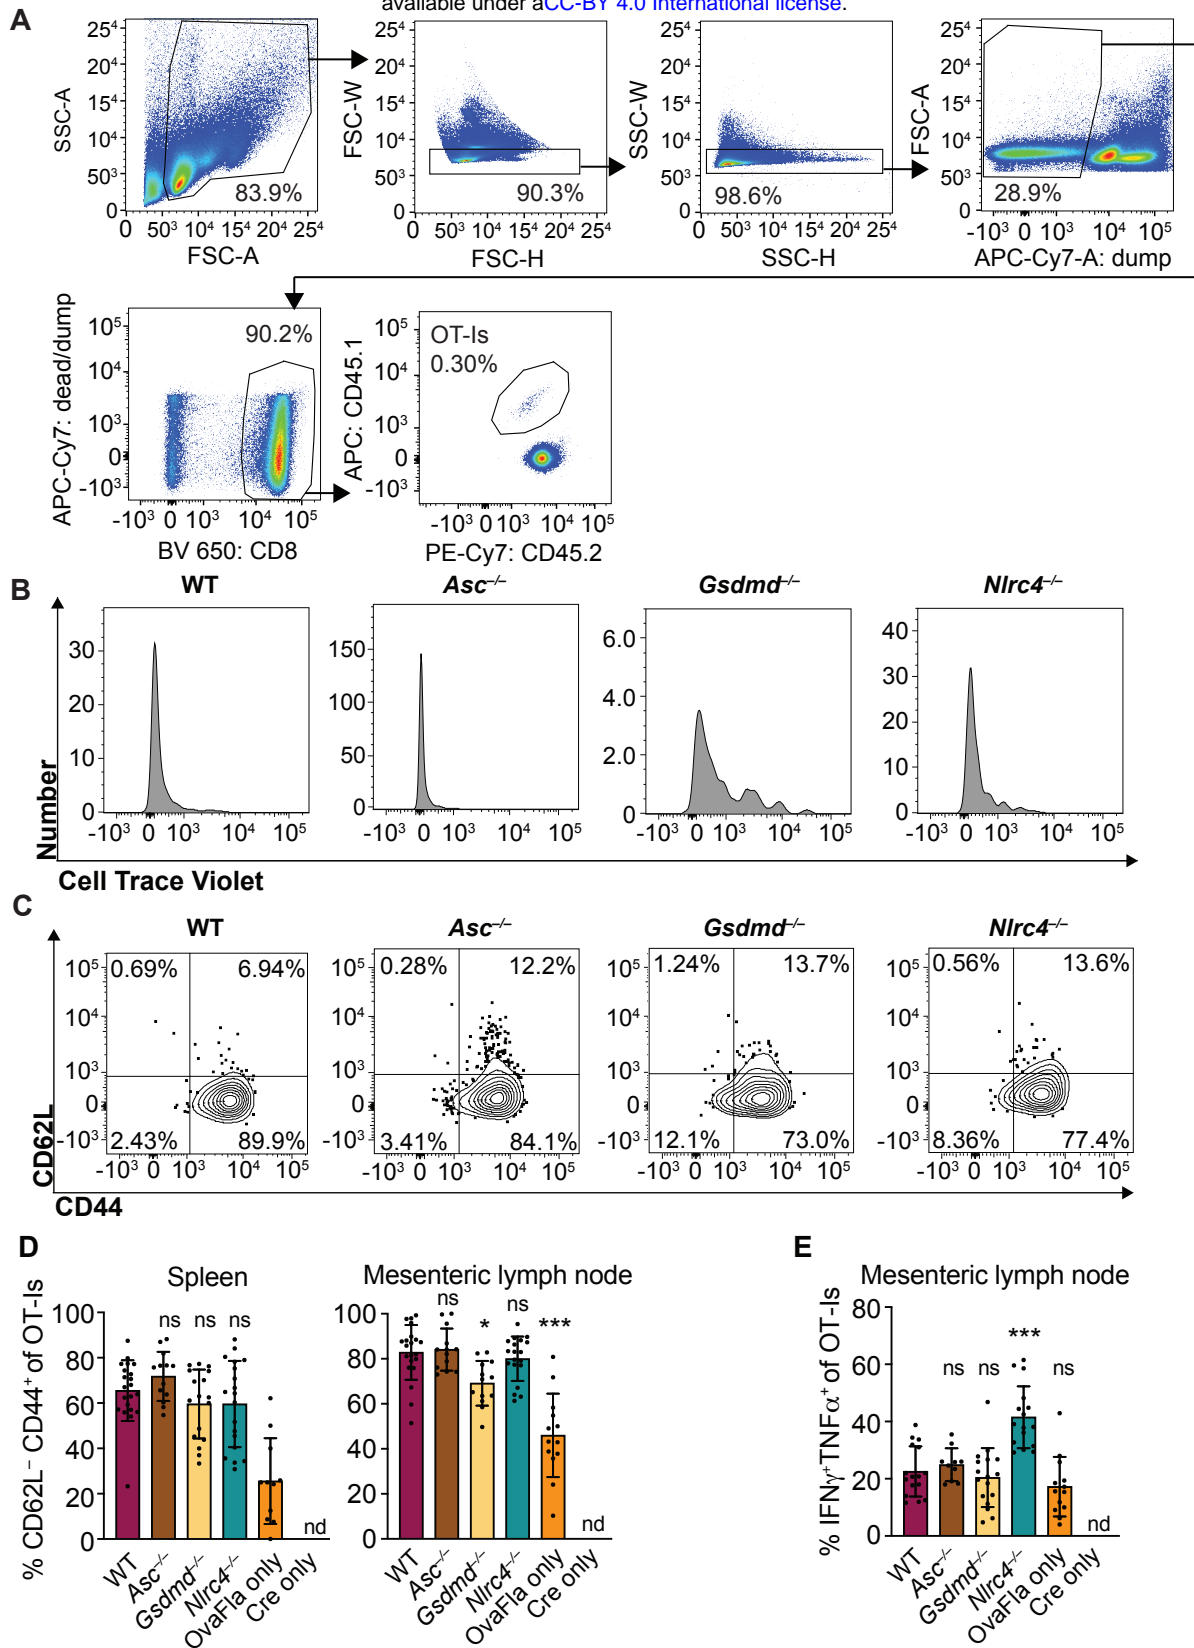

**Figure 3—figure supplement 1.** OvaFla expression in IECs results in OT-I proliferation and activation that is independent of ASC and NLRC4 but partially dependent on gasdermin D. **A.** Flow cytometry gating strategy for identifying OT-I T cells. **B.** Representative histograms of CellTrace Violet dilution for each of the OvaFla mouse lines. **C.** Representative dot plots of each OvaFla mouse line showing the gating strategy for identifying CD62L<sup>-</sup>CD44<sup>+</sup> OT-I cells. **D.** Percent of OT-I cells that are CD62L<sup>-</sup>CD44<sup>+</sup> per spleen (left) and mesenteric lymph node (right). **E.** Percent of OT-I cells from the mesenteric lymph node that are IFN $\gamma$ <sup>+</sup>TNF $\alpha$ <sup>+</sup> following a 5-hour ex vivo stimulation with PMA (1 $\mu$ g/mL) and ionomycin (1 $\mu$ g/mL). D-E, data are from three independent experiments, and each dot represents an individual mouse. Data shown as mean  $\pm$  SD. Significance calculated using one-way ANOVA and Tukey's multiple comparisons test (\* $p$  < 0.05, \*\* $p$  < 0.01, \*\*\* $p$  < 0.001). Only  $p$  values between WT and other experimental groups are shown.



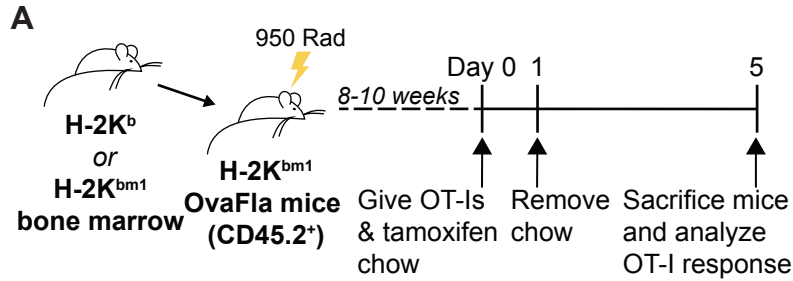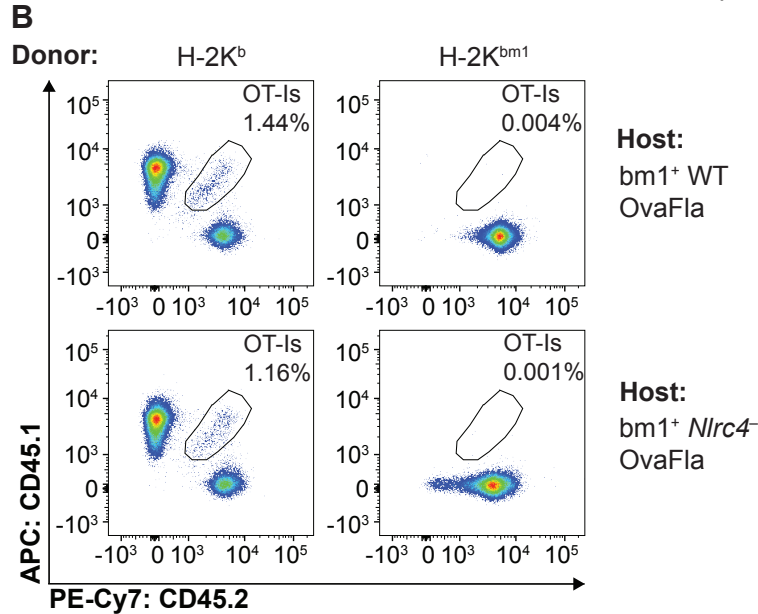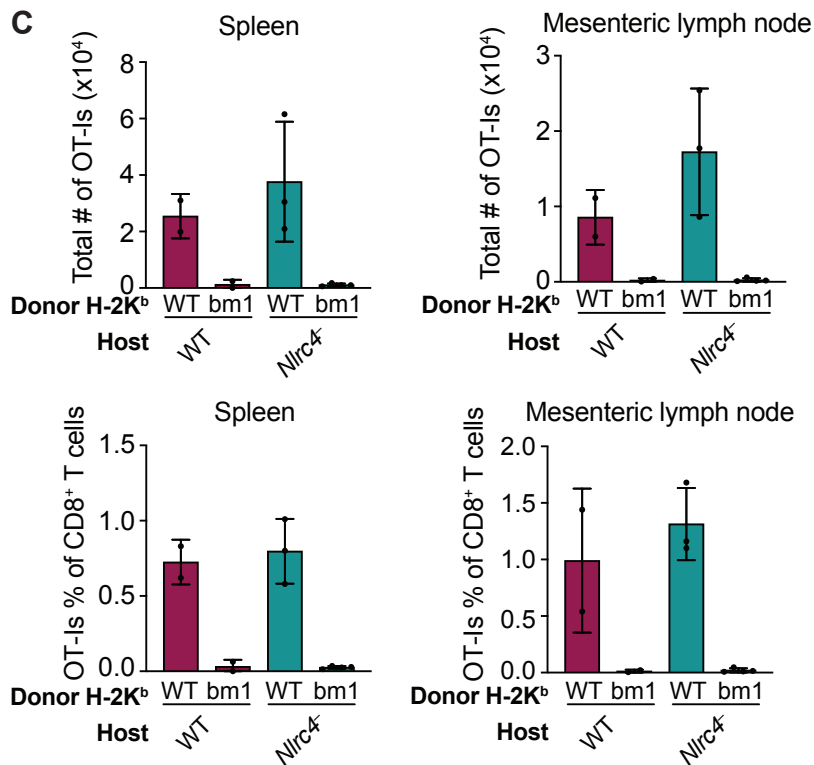

**Figure 4—figure supplement 2.** K<sup>b</sup> donor bone marrow is required for OT-I proliferation and activation in bm1<sup>+</sup> OvaFla bone marrow chimeras. **A.** Schematic depicting the production and analysis workflow of chimeric bm1<sup>+</sup> OvaFla mice that were given either B6 H-2K<sup>b</sup> or H-2K<sup>bm1</sup> bone marrow. **B.** Representative flow plots demonstrating the absence of OT-I's in the mice given H-2K<sup>bm1</sup> bone marrow, as depicted in A. **C.** Quantification of the total number of OT-I's (top) and the OT-I's as a percent of total CD8<sup>+</sup> T cells (bottom) in the spleen (left) and mesenteric lymph nodes (right) of bm1<sup>+</sup> WT and bm1<sup>+</sup> *Nlrp4*<sup>-</sup> OvaFla mice as depicted in A. Data are from a single experiment, and each dot represents an individual mouse. Data shown in C as mean ± SD.

**Donor: B6 (H-2K<sup>b</sup>) Recipient: WT OvaFla (H-2K<sup>bm1</sup>)**

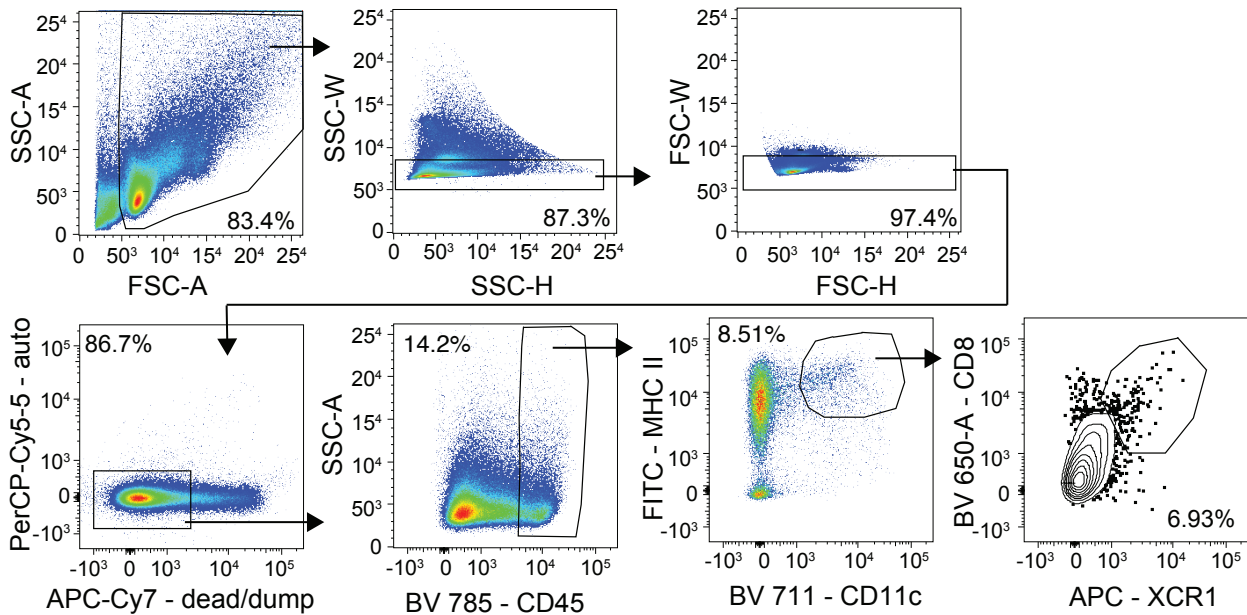

**Donor: *Batf3*<sup>-/-</sup> (H-2K<sup>b</sup>) Recipient: WT OvaFla (H-2K<sup>bm1</sup>)**

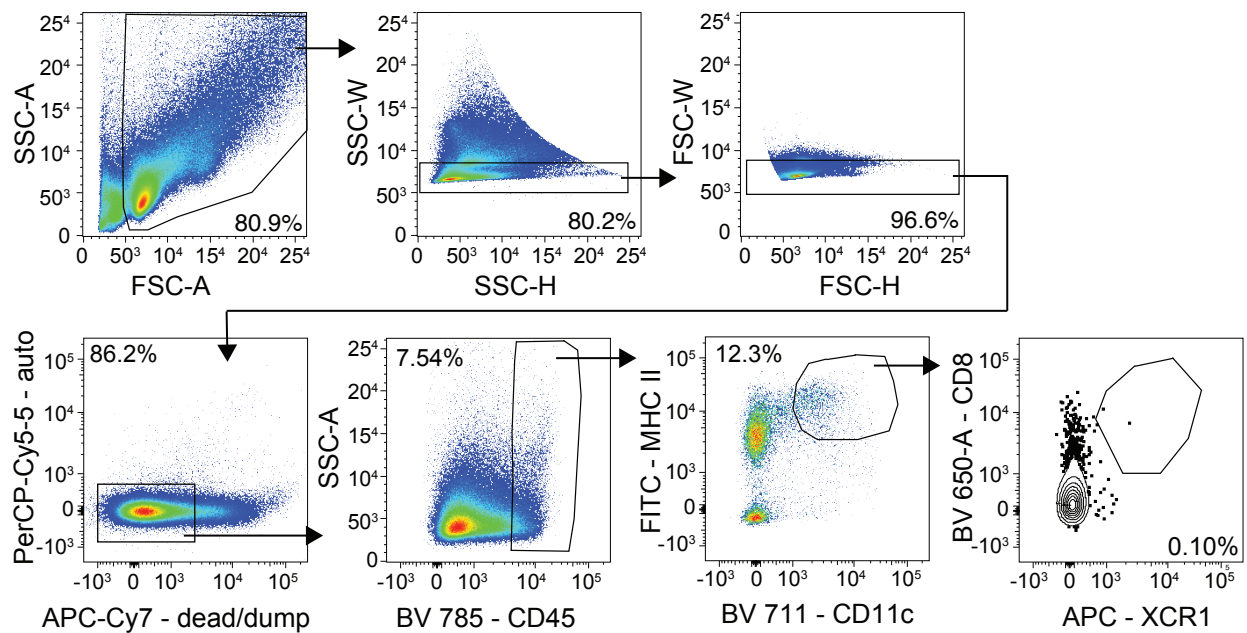

**Figure 5—figure supplement 1.** Gating demonstration for Figure 5A. Representative dot plots from one *bm1*<sup>+</sup> WT OvaFla mouse that received B6 bone marrow (top) and one *bm1*<sup>+</sup> WT OvaFla mouse that received *batf3*<sup>-/-</sup> bone marrow (bottom).



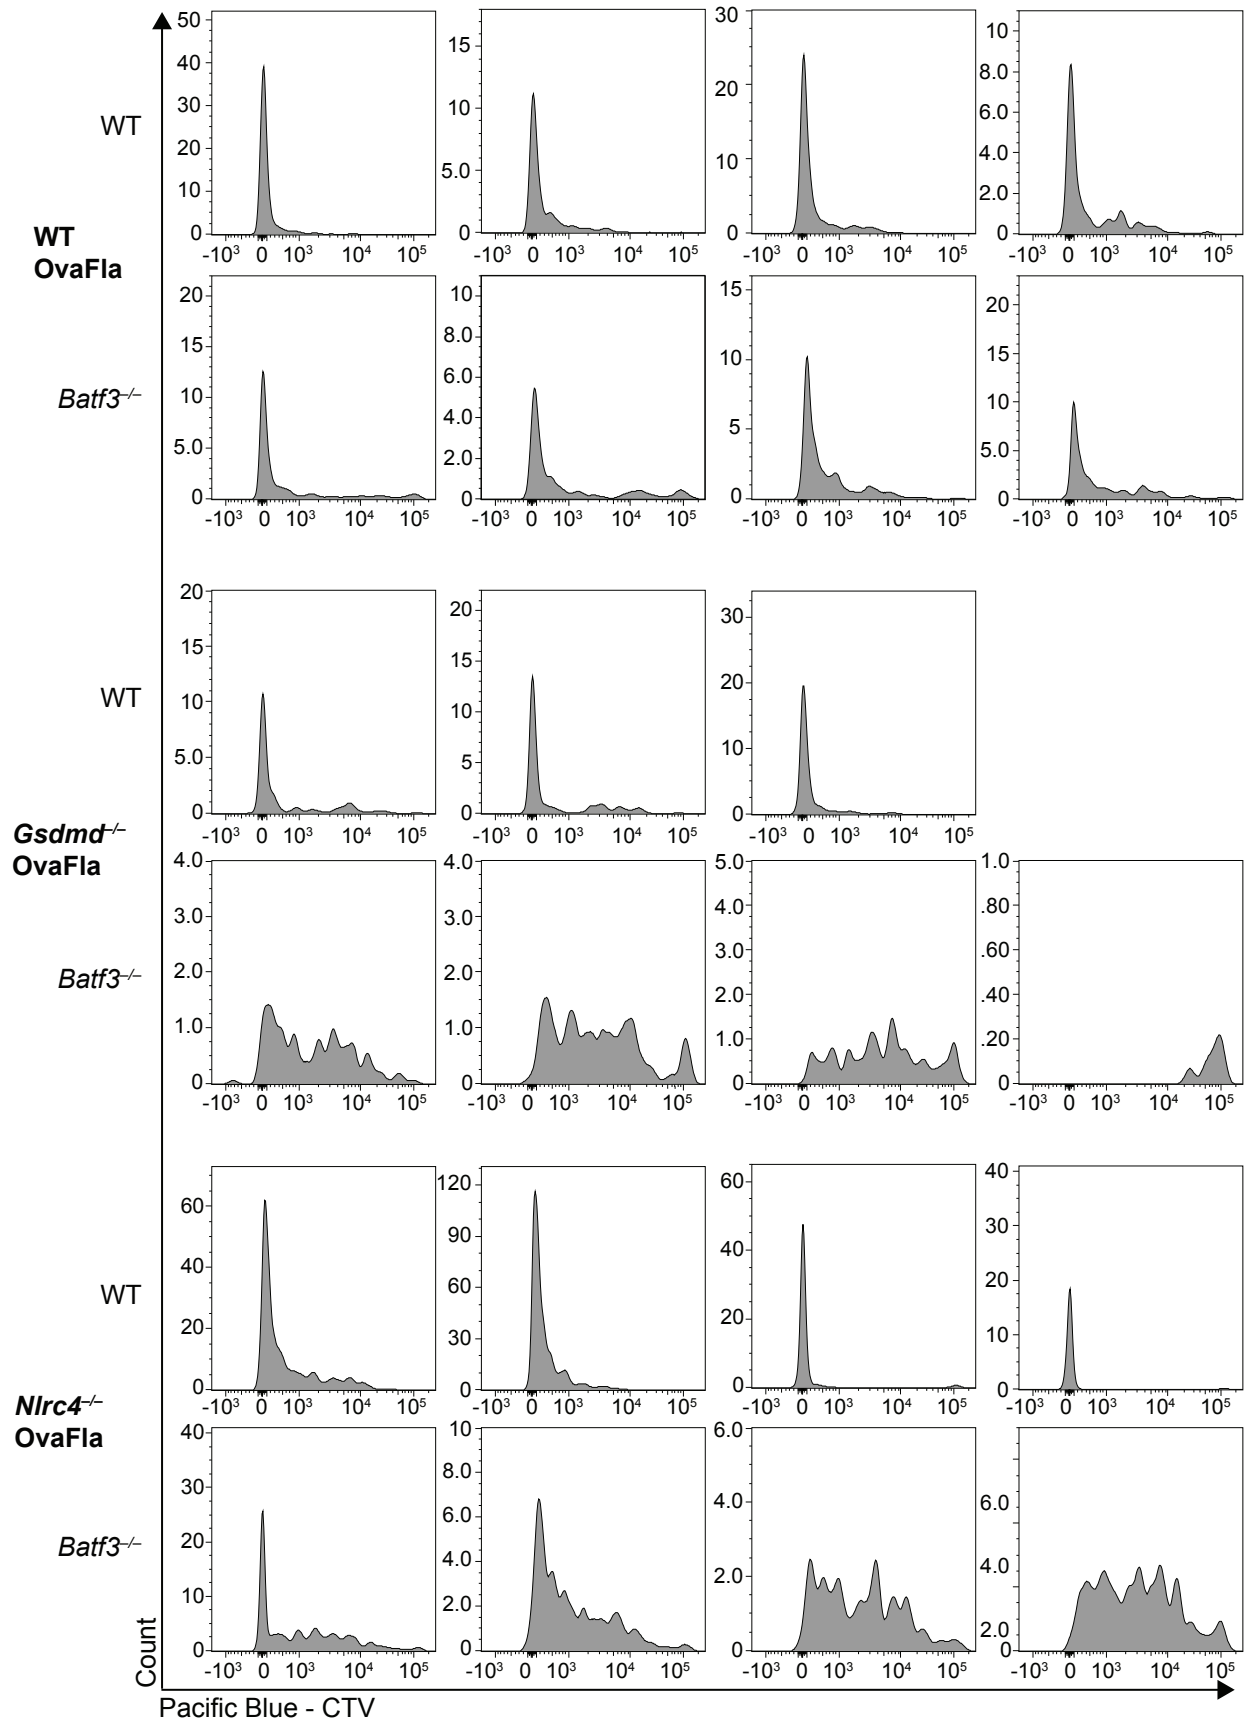

**Figure 5—figure supplement 2.** Representative histograms demonstrating the dilution of CellTrace Violet dye of OT-Is from individual mice shown in figure 5D. OT-Is are gated per Figure 3—figure supplement 1.

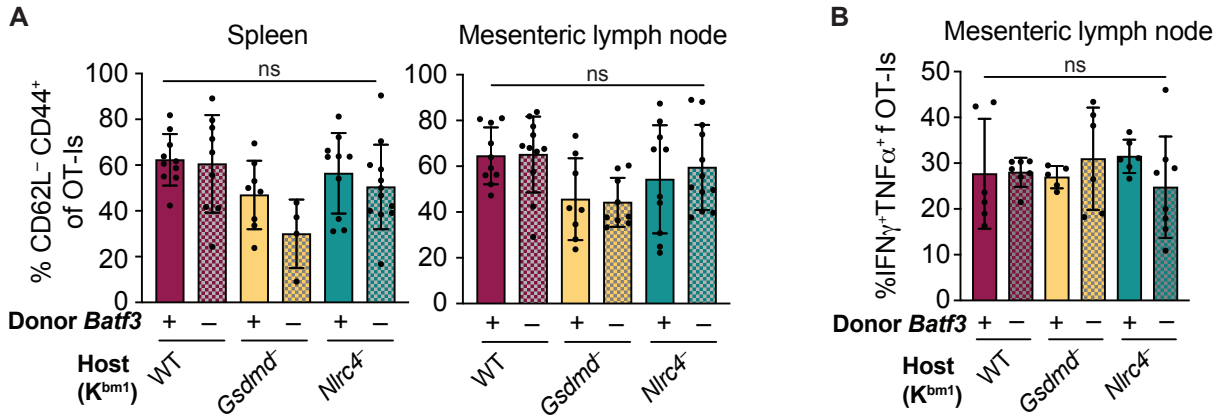

**Figure 5-figure supplement 3.** No difference in the percent of CD62L<sup>-</sup>CD44<sup>+</sup> OT-I T cells or in the IFN $\gamma$  and TNF $\alpha$  production between genotypes of *bm1*<sup>+</sup> OvaFla mice. **A.** Percent of OT-Is that are CD62L<sup>-</sup>CD44<sup>+</sup> in the spleen (left) and mesenteric lymph nodes (right). **B.** Percent of OT-Is from the mesenteric lymph node that are IFN $\gamma$ <sup>+</sup> and TNF $\alpha$ <sup>+</sup> following a 5-hour ex vivo stimulation with PMA (1 $\mu$ g/mL) and ionomycin (1 $\mu$ g/mL). A, data are from three independent experiments. B, data are from two independent experiments. Each dot represents an individual mouse. Data shown as mean  $\pm$  SD. Significance calculated using one-way ANOVA and Šídák's multiple comparisons test (\* $p < 0.05$ , \*\* $p < 0.01$ , \*\*\* $p < 0.001$ ).
